# Supplementary material for: Identification and characterization of circRNAs as competing endogenous RNAs for miRNA-mRNA in colorectal cancer
Source: PeerJ. 2019 Sep 19;7:e7602. doi: 10.7717/peerj.7602 (PMC6754974; doi:10.7717/peerj.7602)
Supplement: File S1 [file peerj-07-7602-s001.xlsx]

## Sheet: Sheet1
Summary of the quality of the raw sequencing data
Sample	Library	Raw Reads	Clean Reads	Raw Base(G)	Clean Base(G)	Effective Rate(%)	Error Rate(%)	Q20(%)	Q30(%)	GC Content(%)
CRC-D-A	RCL00033-1	45516084	43801299	13.65	13.14	96.23	0.03	95.26	89.72	64.03
CRC-C-A	RCL00034	42088603	36673756	12.63	11	87.13	0.03	95.64	90.51	64.1
CRC-D-B	RCL00031	48193183	40463197	14.46	12.14	83.96	0.03	95.17	89.91	49.09
CRC-C-B	RCL00032-1	42696354	41212093	12.81	12.36	96.52	0.03	95.56	90.12	68.17
CRC-D-C	RCL00035	43582662	40889131	13.07	12.27	93.82	0.03	95.86	91.31	47.49
CRC-C-C	RCL00030-1	41334404	39871884	12.4	11.96	96.46	0.03	95.17	89.78	49.05
