# Supplementary material for: Identification and characterization of circRNAs as competing endogenous RNAs for miRNA-mRNA in colorectal cancer
Source: PeerJ. 2019 Sep 19;7:e7602. doi: 10.7717/peerj.7602 (PMC6754974; doi:10.7717/peerj.7602)
Supplement: File S3 [file peerj-07-7602-s003.xlsx]

## Sheet: Additional file 3
Differentially expressed miRNAs in the CRC
ID	logFC	logCPM	PValue	FDR
hsa-mir-197	-4.01368	8.33676	3.06e-183	1.76e-180
hsa-mir-328	-4.48738	4.49842	4.35e-171	1.25e-168
hsa-let-7d	-2.73813	9.37174	2.69e-105	5.17e-103
hsa-mir-139	-4.35722	5.36986	9.57e-104	1.38e-101
hsa-mir-486-2	-4.8327	5.84205	4.89e-83	5.63e-81
hsa-mir-486-1	-4.82896	5.84081	2.57e-81	2.47e-79
hsa-mir-766	-3.5517	3.01422	9.85e-81	8.11e-79
hsa-mir-1306	-3.3303	3.11519	1.99e-74	1.43e-72
hsa-mir-21	6.7058	17.6991	5.99e-74	3.83e-72
hsa-mir-125a	-3.02552	8.43521	1.54e-70	8.86e-69
hsa-mir-504	-5.37087	0.554076	7.69e-67	4.03e-65
hsa-mir-1976	-3.37657	3.32357	3.37e-63	1.62e-61
hsa-mir-6511b-2	-4.20322	0.534301	3.4e-62	1.51e-60
hsa-mir-101-2	5.89032	11.6792	2.31e-57	9.52e-56
hsa-mir-101-1	5.90371	11.6637	3.24e-57	1.24e-55
hsa-let-7b	-2.49035	13.3878	3.74e-50	1.35e-48
hsa-mir-6511b-1	-4.24208	0.55135	8.45e-49	2.86e-47
hsa-mir-141	5.64197	10.9033	1.19e-41	3.82e-40
hsa-mir-423	-2.12245	7.20397	6.32e-40	1.92e-38
hsa-mir-574	-2.75839	6.0245	3.32e-39	9.56e-38
hsa-mir-374a	8.25993	10.0109	1.16e-38	3.19e-37
hsa-mir-149	-3.3596	3.98832	1.36e-35	3.57e-34
hsa-mir-98	4.88777	5.7829	2.58e-35	6.47e-34
hsa-mir-24-2	2.87447	10.0156	4.84e-35	1.16e-33
hsa-mir-542	6.12526	7.37129	7.92e-34	1.83e-32
hsa-mir-126	4.41356	11.1137	2.15e-33	4.76e-32
hsa-mir-29b-1	5.95147	8.79656	3.05e-33	6.51e-32
hsa-mir-19b-1	7.20705	7.10413	8.94e-33	1.84e-31
hsa-mir-335	5.49792	7.84088	1.87e-31	3.71e-30
hsa-mir-24-1	2.7222	10.0086	2.25e-31	4.32e-30
hsa-mir-374b	4.58846	6.26148	2.66e-31	4.95e-30
hsa-mir-19b-2	7.33259	6.9194	5.39e-31	9.69e-30
hsa-mir-15a	4.16208	7.05194	5.69e-30	9.92e-29
hsa-mir-152	4.25233	7.69871	9.45e-30	1.6e-28
hsa-mir-1296	-2.74975	2.59507	1.01e-29	1.66e-28
hsa-mir-99b	-2.16986	13.8956	1.16e-29	1.85e-28
hsa-mir-2355	4.64724	5.21154	3.1e-29	4.83e-28
hsa-mir-145	-2.98681	11.5934	6.24e-29	9.47e-28
hsa-mir-181a-1	-2.2508	9.00456	9.7e-29	1.43e-27
hsa-mir-30e	2.59549	13.1969	1.88e-28	2.7e-27
hsa-mir-16-2	4.8641	8.5051	7.26e-28	1.02e-26
hsa-mir-582	5.89859	8.69561	9.32e-28	1.28e-26
hsa-mir-16-1	4.7593	8.48398	5.65e-27	7.57e-26
hsa-mir-379	4.9381	9.69242	7.7e-27	1.01e-25
hsa-mir-708	6.23858	5.90837	1.11e-26	1.42e-25
hsa-mir-590	7.95812	4.7749	5.74e-26	7.19e-25
hsa-mir-326	-2.8429	2.4313	1.22e-25	1.49e-24
hsa-mir-20a	5.77479	9.19098	1.67e-25	1.96e-24
hsa-mir-889	6.45614	4.07607	1.67e-25	1.96e-24
hsa-mir-642a	-3.44056	2.42574	3.4e-25	3.86e-24
hsa-mir-150	-2.90183	8.97485	3.42e-25	3.86e-24
hsa-mir-182	5.48245	14.0752	5.03e-25	5.57e-24
hsa-mir-424	5.8302	7.20345	1.18e-24	1.28e-23
hsa-mir-3615	-2.60495	2.60172	2.19e-24	2.33e-23
hsa-mir-452	5.40323	6.94866	2.28e-24	2.39e-23
hsa-mir-129-1	-4.05921	1.59869	2.44e-24	2.51e-23
hsa-mir-142	7.4027	11.4699	4.2e-24	4.24e-23
hsa-mir-148a	4.36106	16.077	1.15e-23	1.12e-22
hsa-mir-1180	-2.85761	3.79154	1.33e-23	1.27e-22
hsa-mir-454	6.2819	3.17935	1.51e-23	1.42e-22
hsa-mir-19a	10.8944	6.04983	3.26e-23	3.02e-22
hsa-mir-2110	-2.51985	1.66182	7.64e-23	6.98e-22
hsa-mir-129-2	-3.75012	1.67987	1.99e-22	1.79e-21
hsa-mir-32	4.03792	5.21733	2.08e-22	1.84e-21
hsa-mir-429	4.26434	8.74637	2.98e-22	2.6e-21
hsa-mir-17	3.86077	10.5477	4.48e-22	3.85e-21
hsa-mir-193a	-2.33418	7.33107	8.92e-22	7.56e-21
hsa-mir-92b	-2.29751	6.20006	1.5e-21	1.25e-20
hsa-mir-96	5.70038	4.41202	7.42e-21	6.02e-20
hsa-let-7g	2.08065	9.33256	1.61e-20	1.27e-19
hsa-mir-135b	9.83091	6.66323	3.32e-20	2.59e-19
hsa-mir-3127	-2.41132	3.07995	4.24e-20	3.25e-19
hsa-mir-193b	-2.11942	5.24827	7.52e-20	5.63e-19
hsa-mir-26b	2.77497	9.33279	8.52e-20	6.21e-19
hsa-mir-3173	-3.04442	0.302358	1.66e-19	1.19e-18
hsa-mir-660	4.41593	5.74556	3.83e-19	2.72e-18
hsa-mir-7-1	3.60143	5.88511	3.89e-19	2.73e-18
hsa-mir-22	2.44105	15.5609	8.78e-19	6.09e-18
hsa-mir-4677	4.76905	2.92904	1.35e-18	9.24e-18
hsa-mir-450b	8.13365	3.35262	1.39e-18	9.39e-18
hsa-mir-30b	3.70138	8.45171	1.67e-18	1.12e-17
hsa-mir-203a	5.18299	14.4495	2.34e-18	1.55e-17
hsa-mir-1226	-2.89982	0.917409	5.24e-18	3.43e-17
hsa-mir-203b	6.71853	7.72482	6.68e-18	4.32e-17
hsa-mir-337	3.44269	4.72293	8.98e-18	5.75e-17
hsa-mir-144	6.23288	6.28039	9.15e-18	5.79e-17
hsa-mir-1295a	-3.47822	-0.231309	1.05e-17	6.55e-17
hsa-mir-136	5.04316	5.16698	1.29e-17	7.97e-17
hsa-mir-27a	2.85192	10.7484	1.5e-17	9.16e-17
hsa-mir-26a-1	2.37669	9.76015	3.45e-17	2.09e-16
hsa-mir-29b-2	3.3922	8.80345	3.62e-17	2.17e-16
hsa-mir-186	2.04371	8.16246	6.87e-17	4.08e-16
hsa-mir-3613	4.34304	4.07759	9.74e-17	5.72e-16
hsa-mir-7641-2	-4.05633	-0.120744	1.27e-16	7.38e-16
hsa-mir-26a-2	2.33267	9.76209	1.73e-16	9.98e-16
hsa-mir-369	4.16338	3.76052	1.93e-16	1.1e-15
hsa-mir-6720	-3.12604	0.183309	2.16e-16	1.22e-15
hsa-mir-3917	-2.6356	1.27627	2.52e-16	1.41e-15
hsa-mir-433	-2.56812	1.01604	3.25e-16	1.8e-15
hsa-mir-485	-2.2962	2.01147	4.42e-16	2.42e-15
hsa-mir-605	-2.94372	0.253067	5.16e-16	2.81e-15
hsa-mir-340	3.3996	4.30558	1.12e-15	5.98e-15
hsa-mir-133a-2	-3.16029	3.92499	1.73e-15	9.15e-15
hsa-mir-1343	-2.91751	0.243589	1.82e-15	9.53e-15
hsa-mir-151a	2.49051	11.3829	4.55e-15	2.34e-14
hsa-mir-3940	-2.64194	1.42107	6.79e-15	3.46e-14
hsa-mir-199b	3.74662	11.516	9.65e-15	4.87e-14
hsa-mir-153-2	6.54755	5.51835	1.54e-14	7.66e-14
hsa-mir-185	2.06847	5.86668	2.28e-14	1.12e-13
hsa-mir-495	4.03633	2.86384	2.84e-14	1.39e-13
hsa-mir-7702	-3.30549	0.875132	3.6e-14	1.74e-13
hsa-mir-183	3.48593	13.1151	4.7e-14	2.26e-13
hsa-mir-7706	-2.13513	1.59518	5.67e-14	2.7e-13
hsa-mir-376c	5.83846	2.73669	6.55e-14	3.09e-13
hsa-mir-1249	-2.29608	1.08847	7.31e-14	3.42e-13
hsa-mir-34a	2.59983	6.89662	1.78e-13	8.2e-13
hsa-mir-301a	5.51531	3.95517	1.9e-13	8.69e-13
hsa-mir-411	4.76893	3.22891	2.06e-13	9.34e-13
hsa-mir-194-1	2.53548	13.1238	2.57e-13	1.16e-12
hsa-mir-6793	-2.75931	-0.0794579	2.66e-13	1.19e-12
hsa-mir-10a	3.83285	16.2965	5.2e-13	2.31e-12
hsa-mir-199a-2	3.09789	11.0649	9.36e-13	4.12e-12
hsa-mir-133a-1	-2.95763	4.07802	9.61e-13	4.19e-12
hsa-mir-192	3.61599	16.2148	1.14e-12	4.95e-12
hsa-mir-187	-3.70562	1.45458	1.36e-12	5.84e-12
hsa-mir-577	8.23638	6.90937	1.39e-12	5.95e-12
hsa-mir-592	10.2014	5.36431	2.45e-12	1.04e-11
hsa-mir-552	5.69763	7.69968	4.3e-12	1.81e-11
hsa-mir-190a	3.49538	2.75929	6.25e-12	2.61e-11
hsa-mir-199a-1	2.75673	10.2288	6.75e-12	2.8e-11
hsa-mir-10b	2.83175	15.2815	7.76e-12	3.19e-11
hsa-mir-218-2	4.85951	3.31042	8.65e-12	3.53e-11
hsa-mir-5187	-2.65216	-0.105984	1.47e-11	5.97e-11
hsa-mir-450a-1	6.57222	1.92058	2.3e-11	9.25e-11
hsa-let-7f-1	4.38731	12.0606	2.32e-11	9.27e-11
hsa-mir-628	6.03939	4.51904	2.66e-11	1.05e-10
hsa-mir-29c	3.30969	10.1015	2.67e-11	1.05e-10
hsa-let-7f-2	4.36094	12.0785	2.96e-11	1.16e-10
hsa-mir-421	4.37607	2.53728	3.19e-11	1.24e-10
hsa-mir-6808	-2.72955	-0.155544	4.39e-11	1.67e-10
hsa-mir-4728	-2.82744	0.959921	5.2e-11	1.97e-10
hsa-mir-375	-2.15392	14.9458	7.73e-11	2.91e-10
hsa-mir-450a-2	6.51241	1.8674	9.04e-11	3.38e-10
hsa-mir-4676	-2.22712	0.593918	1.06e-10	3.95e-10
hsa-mir-7-2	7.11372	2.40893	2.42e-10	8.78e-10
hsa-mir-196a-2	3.48207	7.26437	3.06e-10	1.1e-09
hsa-mir-95	3.45171	4.05154	3.2e-10	1.14e-09
hsa-mir-5010	-2.1146	0.46878	7.01e-10	2.49e-09
hsa-mir-3928	-2.12122	1.0838	8.01e-10	2.83e-09
hsa-mir-217	4.42874	5.35021	8.36e-10	2.94e-09
hsa-mir-1228	-2.1429	0.600082	1.17e-09	4.05e-09
hsa-mir-3605	-2.06535	1.83224	1.43e-09	4.86e-09
hsa-mir-6125	-2.53864	0.0572552	2.34e-09	7.93e-09
hsa-mir-651	4.29808	2.0252	2.88e-09	9.69e-09
hsa-mir-598	3.6317	3.89996	3.28e-09	1.1e-08
hsa-mir-130a	2.1379	5.26429	4.14e-09	1.38e-08
hsa-mir-1224	-3.59743	1.45883	4.29e-09	1.42e-08
hsa-mir-215	4.9577	10.0067	4.3e-09	1.42e-08
hsa-mir-3677	3.23689	3.42574	4.52e-09	1.48e-08
hsa-mir-493	2.08857	3.88914	5.68e-09	1.85e-08
hsa-mir-188	3.60756	3.09462	5.93e-09	1.92e-08
hsa-mir-653	8.02639	3.24563	6.17e-09	1.98e-08
hsa-mir-224	2.81216	6.47967	6.9e-09	2.21e-08
hsa-mir-18a	2.79588	5.1708	7.47e-09	2.38e-08
hsa-mir-7155	-2.63503	-0.214177	9.42e-09	2.98e-08
hsa-mir-2116	-2.02299	0.42773	9.64e-09	3.04e-08
hsa-mir-223	3.46366	8.60855	1.43e-08	4.47e-08
hsa-mir-33a	3.44483	5.98125	1.48e-08	4.62e-08
hsa-mir-3944	-2.53227	-0.142775	1.61e-08	4.97e-08
hsa-mir-1-1	5.93409	4.75053	1.66e-08	5.11e-08
hsa-mir-143	3.70291	17.3994	2.33e-08	7.15e-08
hsa-mir-451a	3.35154	8.2798	3.51e-08	1.07e-07
hsa-mir-615	-3.11144	1.32278	4.16e-08	1.26e-07
hsa-mir-496	3.87177	1.69358	4.88e-08	1.47e-07
hsa-mir-4668	6.22441	1.64612	5.45e-08	1.64e-07
hsa-mir-490	-3.5146	2.60768	5.78e-08	1.72e-07
hsa-mir-106a	4.53353	5.71922	6.03e-08	1.79e-07
hsa-mir-7-3	4.58437	2.35795	6.43e-08	1.9e-07
hsa-mir-584	2.74958	8.45506	7.43e-08	2.18e-07
hsa-mir-1-2	5.53338	4.82877	8.49e-08	2.48e-07
hsa-mir-196a-1	2.76166	7.23092	8.82e-08	2.57e-07
hsa-mir-3150b	-2.33496	2.13864	1.14e-07	3.27e-07
hsa-mir-376a-1	5.64717	1.17259	1.14e-07	3.27e-07
hsa-mir-5000	4.15341	1.30882	1.23e-07	3.5e-07
hsa-mir-146a	2.51815	7.9636	1.81e-07	5.05e-07
hsa-mir-655	4.27909	1.36437	2.16e-07	5.96e-07
hsa-mir-576	2.23396	3.65732	2.16e-07	5.96e-07
hsa-mir-1245a	5.67183	1.19085	2.26e-07	6.2e-07
hsa-mir-6802	-2.30667	-0.213869	2.53e-07	6.92e-07
hsa-mir-338	3.09713	9.04974	4.02e-07	1.09e-06
hsa-mir-33b	3.785	2.96468	4.51e-07	1.21e-06
hsa-mir-4662a	4.18785	3.64989	4.88e-07	1.31e-06
hsa-mir-301b	4.73338	1.81184	6.07e-07	1.62e-06
hsa-mir-5586	5.43669	1.01017	7.44e-07	1.96e-06
hsa-mir-627	3.34207	1.63741	8.09e-07	2.13e-06
hsa-mir-376b	4.16653	1.292	1.28e-06	3.32e-06
hsa-mir-494	4.05927	1.19768	1.38e-06	3.55e-06
hsa-mir-1277	5.51687	1.08137	1.77e-06	4.5e-06
hsa-mir-196b	3.14947	11.8449	1.97e-06	4.98e-06
hsa-mir-153-1	5.7211	1.2333	2.48e-06	6.15e-06
hsa-mir-181d	2.77405	4.42472	2.77e-06	6.86e-06
hsa-mir-549a	5.54384	1.09955	5.62e-06	1.36e-05
hsa-mir-7641-1	-2.5381	0.825663	6.98e-06	1.67e-05
hsa-mir-556	5.36143	0.966584	9.8e-06	2.33e-05
hsa-mir-4791	5.3464	0.959122	1.01e-05	2.39e-05
hsa-mir-3682	4.92364	0.648348	2.29e-05	5.33e-05
hsa-mir-4787	-2.25822	-0.179276	2.55e-05	5.86e-05
hsa-mir-4444-2	4.87597	0.659665	2.69e-05	6.12e-05
hsa-mir-570	4.80484	0.5759	5.14e-05	0.000115312
hsa-mir-7705	5.04696	0.73483	5.21e-05	0.000116253
hsa-mir-3913-2	3.24374	0.623669	7.47e-05	0.000165648
hsa-mir-643	4.65466	0.497635	7.81e-05	0.000171664
hsa-mir-380	4.7416	0.520628	0.000101855	0.000221391
hsa-mir-545	4.44432	0.376845	0.000115012	0.000249048
hsa-mir-376a-2	4.65246	0.474346	0.0001471	0.000317339
hsa-mir-3662	4.89256	0.637143	0.000152821	0.000328451
hsa-mir-147b	2.6118	2.60969	0.000246493	0.000520073
hsa-mir-656	4.41157	0.328619	0.000291514	0.000610588
hsa-mir-559	4.54063	0.411813	0.000347668	0.000720348
hsa-mir-3065	2.15544	3.8644	0.000427187	0.000878784
hsa-mir-580	4.38775	0.318195	0.000448261	0.000915597
hsa-mir-4444-1	4.33107	0.317206	0.000470956	0.000948498
hsa-mir-3117	4.23669	0.224945	0.00059778	0.00119973
hsa-mir-514a-3	7.13391	2.3486	0.000632455	0.00126053
hsa-mir-499a	5.65701	1.18042	0.000689326	0.00136914
hsa-mir-514a-2	7.17884	2.39101	0.000806277	0.00159046
hsa-mir-514a-1	7.14205	2.35784	0.000863783	0.00169809
hsa-mir-508	5.11485	5.56626	0.00101109	0.00194778
hsa-mir-6854	2.43306	0.584019	0.00102044	0.00195925
hsa-mir-5683	6.38697	1.80183	0.00102901	0.00196913
hsa-mir-9-2	2.3666	7.00988	0.00125647	0.00239646
hsa-mir-548f-1	5.18763	0.845197	0.00134424	0.00253867
hsa-mir-9-3	2.35469	7.02008	0.00134426	0.00253867
hsa-mir-3912	3.97391	0.0742423	0.00163964	0.00304589
hsa-mir-9-1	2.29618	7.01024	0.00164457	0.00304589
hsa-mir-412	2.16579	2.71314	0.00188419	0.00345634
hsa-mir-4999	3.02488	0.522871	0.00200137	0.00363655
hsa-mir-3664	2.8177	0.375252	0.002047	0.00370777
hsa-mir-1255a	3.94298	0.0937335	0.00237336	0.00428544
hsa-mir-374c	5.76749	1.20545	0.0025671	0.00462078
hsa-mir-3189	4.1316	0.18257	0.00269548	0.00482173
hsa-mir-4766	4.04905	0.152255	0.002869	0.00511623
hsa-mir-3942	3.89382	0.0514613	0.00343601	0.00605242
hsa-mir-5706	3.79257	0.00713976	0.00372272	0.00651759
hsa-mir-216a	2.53277	0.967345	0.00377761	0.00659365
