# Supplementary material for: Identification and characterization of circRNAs as competing endogenous RNAs for miRNA-mRNA in colorectal cancer
Source: PeerJ. 2019 Sep 19;7:e7602. doi: 10.7717/peerj.7602 (PMC6754974; doi:10.7717/peerj.7602)
Supplement: File S4 [file peerj-07-7602-s004.xlsx]

## Sheet: Additional file 4
Differentially expressed mRNAs in the CRC
ID	logFC	logCPM	PValue	FDR
BEST4	-5.89739	3.13202	1.86E-318	3.29E-314
CLEC3B	-4.21774	2.53652	1.6e-252	1.41e-248
CUBN	-5.06486	1.63241	1.41e-238	8.29e-235
SLC25A34	-4.06486	1.46	1.08e-227	4.75e-224
SLC51A	-4.2483	3.33625	1.74e-227	6.13e-224
CPO	-6.21952	-0.10753	1.08e-205	3.19e-202
ABCG2	-4.8094	3.33413	1.76e-193	4.43e-190
TEX11	-4.12415	-0.141642	1.38e-184	3.05e-181
PHLPP2	-2.62619	4.75296	5.62e-182	1.1e-178
CA7	-5.71947	3.50691	2.26e-180	3.99e-177
USP2	-4.0673	2.53586	8.71e-179	1.4e-175
UGP2	-2.10235	6.96335	5.71e-177	8.4e-174
OTOP2	-8.17455	3.14059	4.64e-168	5.85e-165
PRKG2	-4.00126	1.14858	1.65e-164	1.94e-161
CA2	-4.73966	7.38023	2.41e-163	2.66e-160
DAO	-5.66137	-0.962772	1.75e-159	1.72e-156
MGAM	-5.09372	2.25306	6.32e-155	5.87e-152
APOA1	-7.40291	3.79686	2.21e-154	1.95e-151
MS4A10	-7.40287	0.0962661	7.62e-152	6.41e-149
MEP1B	-5.57539	2.30423	5.06e-149	4.06e-146
SCARA5	-4.79014	3.47948	8e-149	6.14e-146
SULT1A2	-3.87089	1.66319	2.77e-143	1.95e-140
IL6R	-2.75645	4.22282	1.1e-142	7.46e-140
CDKN2B	-3.27232	4.75686	1.25e-141	7.91e-139
CDH3	6.00777	6.64541	2.23e-141	1.36e-138
SLC36A1	-2.0037	4.95772	2.63e-141	1.55e-138
DHRS7C	-5.09463	-3.14242	3.18e-141	1.81e-138
AQP8	-7.00493	6.80284	5.44e-141	3e-138
PDCD4	-2.02376	6.81948	5.95e-140	3.18e-137
C2orf88	-3.54503	4.17731	4.19e-137	2.18e-134
GLP2R	-3.87423	0.89922	1.55e-136	7.81e-134
GCNT2	-3.73511	1.93411	1.14e-134	5.6e-132
SLC51B	-4.11503	3.47089	1.52e-134	7.23e-132
SPIB	-4.61127	2.88276	9.93e-134	4.61e-131
GUCA2A	-5.27782	5.99163	1.49e-133	6.74e-131
LYVE1	-4.12051	2.75674	1.54e-133	6.79e-131
PKIB	-3.86811	4.40191	1.28e-131	5.52e-129
NAALADL1	-3.43829	3.0436	4.33e-129	1.82e-126
TAT	-3.76314	-1.19012	3.28e-127	1.32e-124
FAM107A	-3.4715	2.31025	1.82e-126	7.14e-124
ABCB11	-4.96864	-0.467477	1.11e-125	4.15e-123
SCGN	-4.92534	0.969213	1.21e-124	4.44e-122
CA1	-6.78327	6.58322	2.74e-124	9.88e-122
CLDN23	-2.94872	4.73238	4.93e-124	1.74e-121
BMP3	-5.26917	2.85455	6.14e-124	2.13e-121
SLC30A10	-5.86156	1.23541	4.29e-123	1.46e-120
ASPA	-3.81387	0.129983	5.93e-123	1.98e-120
ADAMDEC1	-3.56779	5.53086	9.53e-123	3.11e-120
GFRA2	-3.64548	0.442613	2.33e-122	7.48e-120
TMEM72	-4.41819	1.67448	2.88e-119	8.76e-117
GUCA2B	-6.26468	3.54832	8.52e-119	2.55e-116
TRPM6	-4.22007	4.10599	1.06e-118	3.13e-116
PLP1	-5.22628	1.63345	2.17e-118	6.28e-116
KRT80	6.80099	5.39082	2.78e-118	7.91e-116
MTHFD1L	2.44898	5.70168	5.54e-118	1.55e-115
CD177	-5.69794	6.11348	8.75e-118	2.41e-115
ZNF575	-2.11084	2.12026	1.35e-117	3.67e-115
VEGFD	-4.31521	-0.749749	1.53e-117	4.08e-115
ETV4	5.36747	6.8725	9.67e-117	2.55e-114
TNXB	-3.95073	4.03488	1.37e-116	3.56e-114
CSRP1	-2.20918	8.25079	2.5e-116	6.4e-114
SMPDL3A	-2.59037	4.80185	2.62e-116	6.61e-114
SLC26A2	-4.17391	8.0341	2.21e-115	5.49e-113
ESM1	5.77545	2.87658	3.49e-115	8.57e-113
PTGS1	-2.86344	4.60018	4.24e-115	1.02e-112
PDK4	-3.27264	4.97799	1.63e-114	3.89e-112
PYGM	-3.82812	1.21531	4.17e-114	9.83e-112
RBFOX3	-4.79802	1.30677	5.69e-114	1.32e-111
TMEM37	-3.10848	4.66816	4.2e-113	9.64e-111
AJUBA	3.03925	4.65697	1.45e-112	3.28e-110
NAAA	-2.1102	5.3011	1.75e-112	3.91e-110
LRRN2	-3.74641	2.73723	2.87e-112	6.33e-110
CCDC69	-2.82741	4.77925	4.67e-112	1.02e-109
PLCD1	-2.28466	4.58887	2.13e-111	4.6e-109
ENTPD5	-2.55861	6.3453	3.69e-111	7.84e-109
MAMDC2	-4.61189	1.79682	1.15e-110	2.42e-108
RXRG	-3.95449	-1.52356	1.3e-110	2.69e-108
ABCA8	-4.43173	2.30171	9.61e-109	1.97e-106
ENPP6	-3.42697	-0.933247	9.87e-109	2e-106
TMEM100	-3.82213	0.774277	4.53e-108	9.08e-106
AHCYL2	-2.66254	6.96161	3.66e-107	7.27e-105
SLC4A4	-4.51863	5.18424	3.88e-107	7.61e-105
DPP6	-4.86197	0.501148	5.19e-107	1.01e-104
TMIGD1	-6.3135	3.60255	7.74e-107	1.49e-104
GSTA2	-5.12939	-1.13936	1.97e-106	3.74e-104
ALPI	-4.43737	2.71961	2.39e-106	4.5e-104
TMCC3	-2.42424	5.0136	2.65e-106	4.93e-104
PLAC9	-2.55643	1.3264	2.05e-105	3.77e-103
TP53INP2	-2.54686	5.90864	2.14e-105	3.89e-103
TMEM220	-2.98382	2.20207	8.3e-105	1.5e-102
TMEM253	-2.99574	0.975857	1.68e-104	3e-102
SGK1	-2.70642	5.91968	6.62e-104	1.17e-101
CMTM5	-4.55948	-2.41203	7.76e-103	1.36e-100
G6PC	-6.40248	-0.988353	3.36e-102	5.82e-100
PYY	-5.82515	3.10513	4.25e-102	7.29e-100
RERGL	-5.05494	-0.760899	1.22e-101	2.08e-99
POPDC2	-3.36376	2.03664	2.92e-101	4.86e-99
FHL1	-3.2468	5.37181	8.38e-101	1.38e-98
SEMA6D	-3.08497	3.52892	3.36e-98	5.39e-96
LDB3	-4.02478	1.6995	3.89e-98	6.19e-96
UGT1A8	-4.2914	1.14858	8.89e-98	1.4e-95
TMEM35A	-3.99812	1.51294	6.37e-97	9.87e-95
NPTX1	-4.83079	1.8158	6.55e-97	1.01e-94
ATP1A2	-4.78904	2.45373	1.27e-96	1.94e-94
HPGDS	-3.12915	0.350442	2.26e-96	3.41e-94
MYOM1	-3.18897	1.82594	5.59e-96	8.36e-94
METTL7A	-2.48672	5.93767	9.85e-96	1.46e-93
CD163L1	-3.00108	3.20099	1.2e-95	1.76e-93
VSTM2A	-5.10367	-0.396416	2.09e-95	3.03e-93
CADM3	-4.54261	1.61353	5.09e-95	7.3e-93
APOC3	-8.18613	1.08576	7.17e-95	1.02e-92
DPT	-3.88632	4.053	5.41e-94	7.58e-92
CNN1	-4.15345	6.78245	1.85e-93	2.57e-91
ADHFE1	-2.79678	-0.204865	2.64e-93	3.64e-91
ENPEP	-3.0962	3.13365	3.27e-93	4.48e-91
SLC17A8	-5.17747	-1.62457	4.35e-93	5.91e-91
HSPB8	-3.57561	4.00869	1.37e-92	1.83e-90
CREB3L3	-4.47898	2.03798	5.71e-92	7.52e-90
MYLK	-3.2846	7.42299	7.36e-92	9.63e-90
AMPD1	-4.02697	-0.288531	1.19e-91	1.55e-89
APOB	-6.79181	4.15981	1.44e-91	1.85e-89
TMEM236	-3.6436	4.15498	2.33e-91	2.99e-89
MYL9	-3.19758	8.2022	3.1e-91	3.93e-89
CLDN1	4.86054	6.6396	4.04e-91	5.02e-89
C1orf115	-2.41357	5.30302	8.94e-91	1.1e-88
SYNM	-4.26411	5.83325	1.12e-90	1.38e-88
MYH11	-4.43457	9.3171	1.26e-90	1.53e-88
MT1M	-4.26877	3.11403	1.62e-90	1.96e-88
GSTM5	-2.88676	0.789705	1.02e-89	1.21e-87
MPZ	-2.69554	0.839324	2.8e-89	3.27e-87
PLCE1	-2.01586	5.09167	2.98e-89	3.47e-87
NKX2-3	-2.79492	2.32026	3.37e-89	3.89e-87
FAM151A	-2.42082	0.904716	1.12e-88	1.28e-86
FAM180B	-4.29011	-2.61281	1.21e-88	1.37e-86
CEACAM7	-4.32558	8.69261	1.35e-88	1.53e-86
GRIK3	-3.45907	0.489625	8.62e-88	9.7e-86
NFE2L3	2.67611	7.09746	9.04e-88	1.01e-85
ACTG2	-4.1629	8.17201	1.48e-87	1.65e-85
SLC17A7	-2.95035	-0.95709	6.35e-87	7.01e-85
CYP3A4	-4.95952	2.15423	1.09e-86	1.19e-84
FAM129A	-2.96339	4.50147	1.75e-86	1.89e-84
NR3C2	-2.63761	4.95497	3.74e-86	4e-84
PDE2A	-2.63547	2.28963	3.95e-86	4.2e-84
PSD	-3.21423	3.22815	1.89e-85	2e-83
MAL	-3.46115	0.0189271	2.32e-85	2.44e-83
TRANK1	-2.13497	5.36898	2.74e-85	2.87e-83
SH2D7	-3.72117	0.0829157	1.05e-84	1.08e-82
SGCG	-4.08719	-2.4503	1.99e-84	2.04e-82
WNT2	5.49753	3.20901	5.08e-84	5.18e-82
SELENOP	-3.21271	6.89005	5.35e-84	5.43e-82
RBPMS2	-3.40893	2.12891	5.5e-84	5.55e-82
KLF4	-2.45161	6.76511	6.6e-84	6.62e-82
DHRS11	-2.3314	5.6911	1.32e-83	1.3e-81
SCNN1B	-4.2206	4.07802	1.58e-83	1.56e-81
ST6GALNAC6	-2.58352	5.6978	2.29e-83	2.25e-81
LIFR	-3.19822	2.43987	4.61e-83	4.5e-81
FOXQ1	6.28862	5.44363	1.06e-82	1.03e-80
MT1F	-2.93762	3.90232	1.15e-82	1.11e-80
CEMIP	5.27401	7.22542	2.34e-82	2.25e-80
NAP1L2	-3.57823	-0.418223	2.9e-82	2.77e-80
MS4A12	-5.44347	5.42464	6.11e-82	5.8e-80
CAVIN2	-2.95678	3.43738	8.29e-82	7.83e-80
UGT1A10	-3.63675	3.06513	1.3e-81	1.21e-79
RDH5	-2.24469	1.41597	1.39e-81	1.29e-79
ELANE	-3.56214	-2.38388	1.77e-81	1.62e-79
GPAT3	-2.46785	3.44474	3.16e-81	2.89e-79
GNAO1	-3.40767	2.72713	6.97e-81	6.34e-79
PRIMA1	-4.5279	1.44108	4.1e-80	3.67e-78
CA4	-5.09163	5.69686	8.29e-80	7.39e-78
SLC10A2	-7.61474	0.735156	2.86e-79	2.53e-77
NR5A2	-2.31166	3.87191	3.6e-79	3.16e-77
ADH1C	-4.08843	5.89315	5.14e-79	4.49e-77
LMOD1	-3.4923	5.42493	5.39e-79	4.69e-77
LRP8	3.06297	4.62509	5.58e-79	4.83e-77
SLC26A3	-4.62301	8.91643	7.75e-79	6.68e-77
GRIN2D	4.89663	5.36693	9.32e-79	7.99e-77
BCHE	-4.09423	0.981161	1.71e-78	1.46e-76
FLNC	-3.37537	6.37071	2.26e-78	1.92e-76
PTN	-2.63136	1.78479	2.72e-78	2.3e-76
C2orf40	-4.15255	-0.170442	5.21e-78	4.36e-76
CLCA4	-5.38394	6.9999	6.63e-78	5.5e-76
ENC1	2.10712	7.45512	7.13e-78	5.88e-76
HSD3B2	-5.68364	1.39973	7.77e-78	6.38e-76
TSPAN7	-2.76438	4.46331	9.48e-78	7.71e-76
TRIP13	2.35821	4.8425	1.75e-77	1.42e-75
CFL2	-2.46259	3.93435	2.17e-77	1.75e-75
PADI2	-3.25411	6.68229	2.25e-77	1.81e-75
CEACAM1	-2.34338	8.23897	2.39e-77	1.91e-75
LGI1	-4.92911	-1.63789	2.84e-77	2.26e-75
STMN4	-4.22138	-2.07108	2.95e-77	2.33e-75
HPSE2	-3.24561	0.124586	3.5e-77	2.76e-75
CHAD	-2.98119	0.836867	3.95e-77	3.1e-75
FAM135B	-4.17432	-1.25418	5.43e-77	4.24e-75
PCSK5	-2.47963	4.12094	1.32e-76	1.02e-74
PDZD4	-3.17626	0.991429	1.37e-76	1.05e-74
SLC5A11	-3.64883	-0.737705	1.84e-76	1.41e-74
TACR2	-3.72814	2.93798	2.13e-76	1.63e-74
APOA4	-8.46859	2.92395	2.37e-76	1.8e-74
SLC2A4	-2.70086	2.38838	6.6e-76	5e-74
OTOP3	-5.94925	-1.42247	1.02e-75	7.67e-74
SLC22A18AS	-2.33498	3.31717	1.42e-75	1.07e-73
PI16	-4.43984	1.67124	2.11e-75	1.58e-73
SCN7A	-4.66778	1.7745	2.25e-75	1.68e-73
SLC17A4	-3.34289	3.13562	4.55e-75	3.37e-73
PRPH	-3.73472	0.361433	5.29e-75	3.91e-73
SLC6A19	-5.40483	3.34893	5.71e-75	4.2e-73
GREM2	-3.80512	2.91256	5.85e-75	4.29e-73
LDHD	-2.94931	4.15937	1.03e-74	7.54e-73
FBXL22	-2.32687	1.12961	1.18e-74	8.61e-73
MT1G	-3.38619	5.91912	1.7e-74	1.23e-72
RNF152	-2.72105	3.37825	3.95e-74	2.82e-72
MT1H	-3.86924	2.98695	4.63e-74	3.3e-72
NEGR1	-2.85484	2.55613	4.71e-74	3.34e-72
SCN9A	-3.35667	1.65596	7.48e-74	5.28e-72
CHP2	-4.00372	5.69404	1.42e-73	1e-71
ASB2	-2.92023	2.69744	1.76e-73	1.23e-71
FXYD1	-3.17207	-0.878415	2.16e-73	1.51e-71
C6orf223	4.89124	5.2845	3.47e-73	2.41e-71
TM6SF2	-3.24983	0.668669	8.25e-73	5.67e-71
PBLD	-2.30578	4.86768	1.3e-72	8.92e-71
NTN1	-2.69102	2.92378	2.99e-72	2.04e-70
PIRT	-4.03188	-0.269168	4.89e-72	3.32e-70
SLC9A3	-3.83406	5.85988	6.2e-72	4.2e-70
STMN2	-3.49858	2.11005	1.32e-71	8.87e-70
TRIB3	3.89377	6.43168	2.35e-71	1.58e-69
SRPX	-2.67644	2.83898	3.48e-71	2.33e-69
NCAM1	-2.89183	2.59358	4.63e-71	3.08e-69
SST	-4.99009	0.933792	4.68e-71	3.11e-69
TRIM40	-3.07908	1.69084	6.92e-71	4.57e-69
WSCD1	-3.04356	3.39076	7.87e-71	5.17e-69
ABI3BP	-2.99933	3.38465	1.17e-70	7.64e-69
ACADS	-2.12487	6.16382	1.24e-70	8.04e-69
HAND2	-3.85616	2.11941	1.5e-70	9.71e-69
HSD17B2	-3.38317	4.93262	1.7e-70	1.1e-68
CCL23	-3.09891	-0.862903	1.82e-70	1.17e-68
PDE6A	-3.44067	1.01867	6.79e-70	4.3e-68
INSL5	-6.16904	1.54499	6.8e-70	4.3e-68
CPM	-2.45038	4.53634	1.03e-69	6.53e-68
ANK2	-3.00328	2.79912	1.97e-69	1.24e-67
PDZRN4	-3.98456	1.06719	2.17e-69	1.36e-67
GSTA1	-4.22565	1.96504	2.63e-69	1.64e-67
PDE9A	-2.56665	4.94325	2.94e-69	1.83e-67
SFRP1	-4.13984	2.86704	3.91e-69	2.41e-67
EDN3	-3.32493	3.58804	3.91e-69	2.41e-67
GDPD2	-3.23533	2.23511	3.91e-69	2.41e-67
SECTM1	-2.9391	5.38429	7.16e-69	4.39e-67
SLC23A1	-3.01488	1.9141	7.35e-69	4.49e-67
KCNMB1	-3.21173	3.3025	9.17e-69	5.58e-67
HRASLS2	-3.28104	1.22719	1.63e-68	9.91e-67
GNG7	-2.54571	2.03169	2.37e-68	1.43e-66
TMEM151B	-3.20932	-1.59777	2.49e-68	1.5e-66
KRTAP13-2	-5.76336	-1.72578	3.23e-68	1.94e-66
TMEM82	-3.34955	1.75922	4.17e-68	2.5e-66
HMP19	-3.96799	-0.184684	8.81e-68	5.25e-66
UNC5C	-2.32011	1.85997	1.51e-67	8.94e-66
EPOP	3.69231	3.88355	1.52e-67	8.95e-66
SYNPO2	-3.60425	6.43257	2.76e-67	1.61e-65
PGM5	-3.33769	4.4595	2.77e-67	1.61e-65
DNAJB5	-2.42765	2.75918	3.98e-67	2.29e-65
EPHX4	4.60973	2.98848	4.23e-67	2.43e-65
CXCL12	-2.55375	5.03215	6.79e-67	3.88e-65
SLCO4A1	3.50864	6.28384	7.04e-67	4.01e-65
HSD11B2	-2.35877	7.38156	8.96e-67	5.09e-65
TCF21	-2.30234	2.30994	1.26e-66	7.14e-65
EMILIN3	-2.62664	-1.02272	1.55e-66	8.73e-65
KIAA1644	-3.07094	1.8956	2.17e-66	1.22e-64
MT1X	-2.3325	4.64943	3.47e-66	1.94e-64
SIM2	4.49273	3.95813	4.42e-66	2.45e-64
CNGB1	-3.48318	-2.17634	7.21e-66	3.97e-64
MAB21L2	-3.14631	3.97968	1.8e-65	9.85e-64
NPY2R	-4.5466	-2.02313	1.92e-65	1.04e-63
SCN11A	-3.35832	-1.17826	2.23e-65	1.21e-63
PHOX2B	-4.53313	-1.5087	3.13e-65	1.7e-63
HHLA2	-2.7764	5.59045	3.66e-65	1.98e-63
ADH1B	-4.35912	4.03974	4.32e-65	2.32e-63
CTNND2	-3.44228	-1.31571	4.34e-65	2.32e-63
HLF	-2.52219	1.7215	5.59e-65	2.96e-63
P2RY1	-2.43647	3.5203	6.03e-65	3.19e-63
PPM1H	2.34784	5.5794	1.2e-64	6.31e-63
FAM46B	-2.93163	1.2991	1.71e-64	8.95e-63
ITM2C	-2.23225	9.35397	1.86e-64	9.7e-63
KIAA1549	2.34044	4.8427	2.24e-64	1.16e-62
BTNL8	-3.27057	4.15656	2.85e-64	1.48e-62
ATP6V1G2	-2.35453	-1.03597	2.96e-64	1.53e-62
GTF2IRD1	2.19873	6.22741	5e-64	2.57e-62
SLC28A1	-4.181	-1.4377	5.06e-64	2.6e-62
PTPRH	-2.05544	5.85665	5.34e-64	2.73e-62
ADCYAP1R1	-3.98432	-0.412401	5.36e-64	2.73e-62
PPP1R12B	-2.5281	6.33922	6.24e-64	3.17e-62
AFF3	-2.93573	1.07895	7.51e-64	3.8e-62
BVES	-2.70477	1.54123	8.17e-64	4.12e-62
TPM2	-2.57998	7.57625	8.47e-64	4.26e-62
KCNA5	-2.5651	-0.767196	1.22e-63	6.12e-62
IQANK1	2.89705	5.21252	1.29e-63	6.45e-62
TPH1	-3.49992	1.0243	1.38e-63	6.89e-62
ELAVL4	-3.15315	-0.626083	1.51e-63	7.5e-62
SPTBN2	3.15305	5.37232	1.6e-63	7.93e-62
TRPV3	-2.96154	1.19264	2.8e-63	1.37e-61
CAND2	-2.19018	0.675608	7.81e-63	3.81e-61
SMYD1	-4.49224	0.120765	1.13e-62	5.48e-61
LRRC19	-2.76132	5.03371	1.91e-62	9.24e-61
LILRB5	-2.67576	2.12495	2.02e-62	9.76e-61
C16orf89	-3.43964	0.735279	2.07e-62	9.97e-61
ADAMTSL3	-3.10208	1.90526	2.32e-62	1.11e-60
NGB	-4.71244	-2.04801	2.72e-62	1.3e-60
JAM2	-2.41093	2.70553	3.44e-62	1.64e-60
SCN2B	-3.59792	-0.543279	4.74e-62	2.26e-60
ADCY5	-2.89216	2.87242	6.77e-62	3.2e-60
HPGD	-2.79824	5.62286	1.11e-61	5.25e-60
PLAC8	-2.9967	6.1847	1.26e-61	5.95e-60
TAGLN	-2.8941	8.37515	1.31e-61	6.15e-60
ACKR2	-2.47185	0.348707	1.35e-61	6.33e-60
ARHGAP44	-2.23783	4.58421	1.4e-61	6.54e-60
KHDRBS2	-4.0104	-2.57461	2.24e-61	1.04e-59
CPEB1	-3.13794	-0.606932	2.29e-61	1.06e-59
NRXN1	-4.36043	0.25651	2.62e-61	1.21e-59
TUBB4A	-3.32643	-0.280882	3.42e-61	1.57e-59
PCP4L1	-3.84806	-0.19467	4.75e-61	2.18e-59
WDR78	-2.2508	2.1127	5.35e-61	2.45e-59
P2RY14	-2.55241	1.70547	6.64e-61	3.02e-59
JCHAIN	-3.78743	9.39137	7.61e-61	3.45e-59
METTL24	-3.20635	-0.850012	1.85e-60	8.39e-59
CEACAM20	-4.61225	-1.50606	1.9e-60	8.57e-59
NEFM	-3.53585	-1.46287	1.91e-60	8.62e-59
CLIC5	-2.09275	6.10541	2.17e-60	9.75e-59
CLDN8	-5.69772	2.43578	2.65e-60	1.19e-58
FGL2	-2.52894	4.81424	4.67e-60	2.07e-58
TMEM171	-2.28224	4.40402	4.78e-60	2.11e-58
CHGA	-4.52624	5.15554	6.13e-60	2.7e-58
CASQ2	-4.31751	2.06777	6.63e-60	2.91e-58
SLC13A1	-5.58934	-1.48507	7.82e-60	3.42e-58
CCBE1	-3.58507	1.22933	8.25e-60	3.59e-58
CDHR5	-2.4584	7.41508	8.35e-60	3.62e-58
ARL14	-2.28425	3.50622	9.8e-60	4.24e-58
PKNOX2	-2.65599	-0.306057	1.03e-59	4.46e-58
SCNN1G	-4.44726	0.673376	1.38e-59	5.94e-58
JPH2	-3.04532	2.9926	1.51e-59	6.5e-58
SCUBE2	-2.55861	2.56178	2.58e-59	1.1e-57
FOXF2	-2.24099	2.82236	7.14e-59	3.05e-57
SLCO4C1	-3.52955	-0.0577573	7.77e-59	3.31e-57
TNFRSF13B	-3.3134	-0.336073	9.53e-59	4.03e-57
C7	-3.63316	4.22392	9.95e-59	4.2e-57
EML1	-2.21384	3.32237	1.01e-58	4.25e-57
MALL	-2.31065	3.87754	1.22e-58	5.14e-57
MDFI	3.65095	3.92983	1.34e-58	5.61e-57
DDN	4.67758	1.81775	1.43e-58	5.97e-57
P2RX2	-3.70671	-2.16491	1.47e-58	6.11e-57
OTX1	5.72088	1.67047	1.66e-58	6.89e-57
HSPB6	-3.53285	4.01688	1.67e-58	6.92e-57
RNF150	-3.05094	2.38927	1.75e-58	7.21e-57
KIAA1257	3.56776	2.32589	1.79e-58	7.36e-57
PLN	-3.33542	3.64896	2.02e-58	8.26e-57
PTGDR2	-2.5903	1.28849	2.22e-58	9.06e-57
SLCO2A1	-2.16158	4.98217	2.56e-58	1.04e-56
SULT1A1	-2.17715	4.68688	2.97e-58	1.21e-56
CNTN4	-2.44647	1.67175	3.1e-58	1.26e-56
FUT1	2.89575	3.24495	4.85e-58	1.96e-56
PCSK2	-4.62964	-0.2732	4.88e-58	1.97e-56
CHAT	-4.4723	-2.82132	6.04e-58	2.42e-56
TMEFF2	-3.88686	-2.12768	8.01e-58	3.2e-56
CPNE7	5.73713	5.02014	1.53e-57	6.08e-56
B3GNT7	-3.20662	5.7511	2.34e-57	9.26e-56
TLR3	-2.02344	3.64551	3.14e-57	1.24e-55
SCIN	-2.68481	4.51918	3.61e-57	1.42e-55
PDX1	4.79796	4.28371	3.91e-57	1.54e-55
ATP2B4	-2.07587	6.23459	4.38e-57	1.71e-55
ARHGEF25	-2.30963	2.97816	4.69e-57	1.83e-55
GPT	-2.91645	4.1961	4.91e-57	1.91e-55
KCNN3	-2.19353	2.20254	5.56e-57	2.16e-55
P2RX1	-2.29178	1.35271	7.1e-57	2.75e-55
ORC6	2.04016	4.07181	1.18e-56	4.54e-55
C8orf88	-2.94163	-0.506685	1.61e-56	6.23e-55
LVRN	-3.12456	-1.38362	1.91e-56	7.36e-55
PKHD1L1	-3.34585	-0.521384	2.91e-56	1.12e-54
PLEKHN1	3.45644	2.1941	3.23e-56	1.24e-54
MOBP	-2.92692	-2.09672	4.35e-56	1.66e-54
ARL4D	-2.24005	1.70314	4.76e-56	1.81e-54
TEAD4	2.31375	4.93545	5.1e-56	1.94e-54
PRSS22	4.11269	4.68402	6.05e-56	2.29e-54
KCNE2	-2.68053	-2.21459	6.43e-56	2.43e-54
AUNIP	2.25034	2.53432	6.59e-56	2.48e-54
SLC7A5	3.11542	7.66508	7.82e-56	2.94e-54
FXYD6	-2.546	3.79725	1.19e-55	4.45e-54
TNS1	-2.67737	6.9912	1.25e-55	4.69e-54
PLCL2	-2.34734	3.22301	1.5e-55	5.6e-54
INHBA	5.53262	5.46453	1.73e-55	6.44e-54
CPNE5	-2.02912	2.85202	2.43e-55	9.03e-54
EPB41L3	-2.61813	4.57211	2.46e-55	9.13e-54
SDCBP2	-2.30471	6.15541	2.86e-55	1.06e-53
KRT20	-2.74608	8.71644	4.08e-55	1.5e-53
C15orf48	-2.37582	7.33796	5.39e-55	1.98e-53
LEXM	-2.55487	-1.61522	5.42e-55	1.99e-53
MYOCD	-2.90064	2.75517	5.47e-55	2e-53
KCNMA1	-2.9591	4.43651	5.66e-55	2.07e-53
GFRA1	-2.97297	2.26959	6.78e-55	2.46e-53
AOC3	-2.68615	5.04437	7.14e-55	2.59e-53
SLC2A2	-5.06021	-0.840307	1.62e-54	5.84e-53
SORCS1	-3.54123	0.342385	2.09e-54	7.54e-53
CBLN2	-2.8501	-0.844623	2.18e-54	7.85e-53
PPP1R14A	-2.4702	3.02334	2.55e-54	9.16e-53
ZG16	-4.64232	7.34945	2.85e-54	1.02e-52
SSTR2	-2.33821	0.624953	7.62e-54	2.7e-52
CLEC9A	-2.71439	-1.6193	8.16e-54	2.88e-52
PPY	-4.24938	-2.84521	9.72e-54	3.41e-52
SUGCT	-2.12081	1.76068	1.11e-53	3.89e-52
VIP	-3.52248	3.11908	1.16e-53	4.04e-52
MORN5	-4.73883	-0.821186	1.52e-53	5.28e-52
LPAR1	-2.08637	3.48996	1.64e-53	5.68e-52
HS3ST6	-4.2014	-2.27878	1.8e-53	6.23e-52
SLC9A9	-2.10029	1.92877	1.85e-53	6.38e-52
LYPD8	-3.61483	6.11769	1.85e-53	6.4e-52
ZC3HAV1L	2.16971	3.0295	2.8e-53	9.61e-52
PIANP	-2.44633	-0.31054	3.22e-53	1.1e-51
NRG2	-2.86092	-1.53225	3.72e-53	1.27e-51
GLDN	-2.50587	1.30952	3.75e-53	1.27e-51
ANPEP	-3.70498	8.20688	3.79e-53	1.29e-51
MYOC	-4.85317	-0.21157	4.42e-53	1.49e-51
NEBL	2.45312	6.65104	4.82e-53	1.62e-51
MRGPRF	-2.52962	3.64264	5e-53	1.68e-51
CBX2	3.63591	4.04869	5.9e-53	1.98e-51
TSPAN1	-2.24424	8.79718	6.39e-53	2.13e-51
CAP2	-2.10185	2.49641	6.69e-53	2.23e-51
GRIK5	-2.80756	0.687548	9.12e-53	3.01e-51
SLC5A12	-3.84068	0.271457	9.23e-53	3.05e-51
ASPG	-3.07412	1.36148	1.15e-52	3.76e-51
DMRTA1	-3.37363	-0.854342	1.33e-52	4.37e-51
MAPK4	-3.70805	-0.195952	1.34e-52	4.37e-51
CLEC10A	-2.71076	2.01283	1.37e-52	4.47e-51
SLC39A10	2.0052	5.39689	1.38e-52	4.5e-51
FRMPD4	-4.212	-1.94245	1.57e-52	5.1e-51
HMGCLL1	-2.83107	-2.15747	1.59e-52	5.17e-51
CNR1	-3.55097	0.466791	1.87e-52	6.05e-51
LARGE2	4.49844	5.39649	1.97e-52	6.37e-51
REEP2	-2.43757	1.05843	2.57e-52	8.27e-51
DACT3	-2.44835	2.47676	2.84e-52	9.12e-51
DISP2	-2.27823	2.75791	3.69e-52	1.18e-50
SPATA12	3.5513	0.287151	4.39e-52	1.4e-50
CDH19	-4.03788	0.30874	5.26e-52	1.67e-50
TNFRSF17	-3.22769	1.33489	5.95e-52	1.89e-50
BTNL3	-2.7731	4.28277	6.57e-52	2.08e-50
EDN2	-2.85693	0.770579	7.08e-52	2.24e-50
CWH43	-3.99212	2.64806	7.88e-52	2.49e-50
TMOD1	-2.71942	1.22421	8.55e-52	2.69e-50
CNTN2	-3.65612	-0.651598	1.08e-51	3.38e-50
CGREF1	3.53574	4.80814	1.57e-51	4.9e-50
ANLN	2.16698	5.91303	2.18e-51	6.81e-50
PHOX2A	-3.52946	-2.39195	2.34e-51	7.27e-50
SH3TC2	3.47412	3.57818	2.77e-51	8.59e-50
FMO5	-2.04725	4.41957	2.98e-51	9.22e-50
LMO3	-3.35067	2.34889	7.05e-51	2.18e-49
WISP2	-3.60224	1.08515	7.73e-51	2.38e-49
ADTRP	-3.11357	4.65913	1.28e-50	3.9e-49
DNASE1L3	-3.28696	2.35617	1.43e-50	4.37e-49
MUSK	-3.40601	-1.42386	1.57e-50	4.78e-49
GPM6A	-4.15265	1.23703	1.57e-50	4.78e-49
CTNNA3	-3.55793	-0.640545	2.79e-50	8.46e-49
KRT24	-5.63709	-0.920757	3.36e-50	1.01e-48
NR1H4	-3.82151	1.44905	4.12e-50	1.24e-48
SALL4	4.80879	1.94545	6.65e-50	1.99e-48
TMEM132A	2.59254	5.40882	8.19e-50	2.45e-48
PNCK	-3.28828	1.58672	1.7e-49	5.05e-48
FJX1	2.93386	2.37864	1.75e-49	5.19e-48
C11orf86	-3.67881	2.57467	1.81e-49	5.38e-48
ELAVL3	-3.31697	-2.47551	1.84e-49	5.47e-48
KIAA1211	-2.08806	3.90203	2.3e-49	6.79e-48
RUNDC3B	-2.40224	1.24295	2.57e-49	7.57e-48
ARHGAP20	-2.53296	0.431821	2.64e-49	7.78e-48
FILIP1	-2.45765	1.94373	2.94e-49	8.64e-48
LIMS2	-2.38483	4.70773	3.13e-49	9.17e-48
RGS9	-2.12525	0.349341	3.76e-49	1.1e-47
SULT1B1	-2.6157	6.3913	4.41e-49	1.29e-47
HAPLN1	-2.33897	1.74025	4.57e-49	1.33e-47
ANGPTL1	-3.65983	1.99879	5.26e-49	1.53e-47
NOVA1	-3.01849	0.314406	5.39e-49	1.56e-47
AGTR1	-3.63859	0.193284	7.11e-49	2.06e-47
HILPDA	2.42279	5.09663	7.32e-49	2.11e-47
KCNB1	-3.56556	0.0131401	7.54e-49	2.18e-47
CRYAB	-2.39899	3.8406	7.74e-49	2.23e-47
COL11A1	6.61143	5.45389	1.01e-48	2.89e-47
ADGRB3	-3.3061	-0.982806	1.02e-48	2.92e-47
SEMA6A	-2.31274	5.03743	1.03e-48	2.95e-47
CCL14	-2.19571	-0.0221833	1.29e-48	3.66e-47
MYOT	-3.50964	-0.946663	1.29e-48	3.68e-47
CA12	-2.23837	7.3503	1.36e-48	3.86e-47
CRHBP	-2.51668	-2.09925	1.69e-48	4.79e-47
S100B	-2.30361	1.81928	2.58e-48	7.26e-47
P2RY4	-3.41456	-1.89788	3.5e-48	9.8e-47
BEND5	-2.35031	-0.357077	6.59e-48	1.84e-46
CES2	-2.09356	8.01867	6.67e-48	1.86e-46
MAS1L	-3.72684	-3.35635	7.7e-48	2.14e-46
TUBAL3	-2.57667	3.27146	8.23e-48	2.29e-46
XKR4	-3.69509	-0.950718	8.29e-48	2.3e-46
EVA1A	3.83002	3.27959	8.33e-48	2.31e-46
GNG3	-2.19062	-1.22742	8.34e-48	2.31e-46
CNTFR	-3.87825	1.67844	1e-47	2.75e-46
SKA3	2.12266	4.75266	1.23e-47	3.38e-46
MSX2	4.86114	3.93467	1.24e-47	3.4e-46
MCIDAS	3.96644	0.267166	1.32e-47	3.63e-46
XRCC2	2.15468	3.26223	1.36e-47	3.71e-46
B4GALNT2	-4.19428	4.70953	1.53e-47	4.17e-46
RHPN1	3.34665	4.88314	1.53e-47	4.17e-46
CDC25B	2.20274	7.41214	2.02e-47	5.47e-46
STOX2	-2.39962	0.350007	2.15e-47	5.8e-46
RNF112	-2.26225	-0.239687	2.18e-47	5.89e-46
LYNX1	-2.49842	1.91598	2.27e-47	6.11e-46
SLC6A6	2.81765	6.94773	2.72e-47	7.3e-46
TNFRSF12A	2.46337	5.88791	3.02e-47	8.1e-46
SPEG	-2.89385	3.22137	3.21e-47	8.58e-46
LRMP	-2.41629	2.26755	3.51e-47	9.39e-46
TAGLN3	-3.54123	-1.04952	4.06e-47	1.08e-45
SLC5A7	-3.96573	-1.82787	4.09e-47	1.09e-45
ALDOB	-3.48121	6.31671	4.76e-47	1.26e-45
CEP72	2.02658	3.53204	4.92e-47	1.3e-45
MAB21L1	-3.16015	-1.91352	5.4e-47	1.42e-45
CADM2	-3.9322	-0.897391	5.61e-47	1.48e-45
DAND5	-2.81574	-1.74795	7.11e-47	1.87e-45
GPR15	-3.54278	0.941365	7.22e-47	1.89e-45
SLIT3	-2.44543	4.24348	7.55e-47	1.98e-45
ZNF536	-2.86091	-0.585376	7.78e-47	2.03e-45
AVPR1B	-3.45266	-3.3266	1.14e-46	2.97e-45
GPX3	-2.32696	5.31837	1.2e-46	3.12e-45
FGFBP2	-2.78937	-1.45334	1.48e-46	3.82e-45
TTLL6	-2.30108	1.44664	1.5e-46	3.87e-45
ATP1B2	-2.31643	0.16282	1.53e-46	3.95e-45
DHRS9	-3.25527	4.91705	2.08e-46	5.34e-45
SCN4B	-2.10548	1.32363	2.13e-46	5.47e-45
NACAD	-2.10996	0.821784	2.27e-46	5.82e-45
HRCT1	-2.50457	3.17076	2.64e-46	6.75e-45
ENHO	-2.59437	-0.404797	2.68e-46	6.83e-45
VWA2	4.02622	4.61898	2.79e-46	7.1e-45
ANGPTL5	-3.16769	-3.05331	2.8e-46	7.11e-45
BCAS1	-2.46716	5.82435	2.9e-46	7.38e-45
CCDC68	-2.02321	4.03551	3.27e-46	8.29e-45
SLC7A9	-4.03438	1.38111	3.37e-46	8.53e-45
LAMA1	-2.43826	2.23604	3.7e-46	9.36e-45
VAT1L	-2.06211	1.47548	4.67e-46	1.18e-44
FABP2	-3.13835	3.66407	5.4e-46	1.36e-44
TCEAL6	-3.73947	-3.2111	7.03e-46	1.76e-44
GDPD3	-2.16663	3.73398	8.51e-46	2.12e-44
TMIGD3	-2.07289	1.57239	8.51e-46	2.12e-44
MMP28	-2.5532	3.63301	2e-45	4.91e-44
BEST2	-3.7458	2.56536	2.03e-45	4.96e-44
HMCN2	-2.40174	4.27999	2.91e-45	7.09e-44
PDE7B	-2.05904	0.827143	2.91e-45	7.09e-44
CMA1	-3.71157	-1.02793	3.03e-45	7.34e-44
CPNE8	-2.05928	2.83888	3.3e-45	7.97e-44
GPM6B	-2.30793	2.25934	4.51e-45	1.09e-43
MOGAT2	-2.81459	4.92923	5.82e-45	1.4e-43
PRKCB	-2.2975	3.01027	6.12e-45	1.47e-43
TGFBI	3.26814	9.91938	6.14e-45	1.47e-43
SLC52A1	-2.72864	0.810479	8.05e-45	1.92e-43
FRRS1L	-3.32433	-1.22569	8.43e-45	2.01e-43
COL10A1	7.92193	4.77533	8.96e-45	2.14e-43
DPF3	-2.28507	1.20346	1.01e-44	2.4e-43
DCLK1	-2.68968	1.48303	1.24e-44	2.94e-43
OGN	-3.6979	2.70898	1.28e-44	3.03e-43
NPY	-3.49415	-2.11327	1.34e-44	3.18e-43
C1QTNF9	-2.60979	-2.19435	2.17e-44	5.12e-43
UGT2B15	-3.18093	2.8501	2.18e-44	5.13e-43
UBE2C	2.15803	6.48484	2.33e-44	5.49e-43
TRIM29	4.43096	6.55438	4.33e-44	1.01e-42
MPP2	-2.01386	1.02176	4.46e-44	1.04e-42
GALNT16	-2.67864	0.669712	5.06e-44	1.18e-42
B3GALT1	-3.23119	1.59358	5.53e-44	1.29e-42
CST1	8.40575	4.81603	6.66e-44	1.54e-42
SPARCL1	-2.18204	6.48726	7.54e-44	1.74e-42
GAP43	-3.11305	0.341858	8.29e-44	1.91e-42
EPHA7	-3.38676	2.0081	8.37e-44	1.93e-42
DES	-3.74142	8.40292	8.44e-44	1.94e-42
AKR1B10	-3.0317	4.8576	9.54e-44	2.19e-42
PPP1R1A	-3.36354	0.544901	1.05e-43	2.4e-42
APOBEC3A	-2.709	0.317354	1.06e-43	2.43e-42
JPH4	-2.49011	-0.877833	1.61e-43	3.67e-42
UGT2B17	-4.07017	6.34404	1.91e-43	4.34e-42
TMEM59L	-2.91826	-0.378018	1.93e-43	4.38e-42
CDH10	-3.67315	-3.19259	2.05e-43	4.64e-42
MAGEE2	-3.12591	-3.31793	2.23e-43	5.03e-42
CPED1	-2.19131	3.46585	2.46e-43	5.54e-42
PEG3	-2.49562	1.01955	2.78e-43	6.26e-42
APLN	3.19104	3.30052	2.94e-43	6.59e-42
SMOX	2.37694	4.69484	4.13e-43	9.23e-42
DUSP26	-2.73082	-1.07382	4.69e-43	1.05e-41
RSPO2	-3.44948	0.408136	4.88e-43	1.09e-41
PRR7	3.5603	3.51226	5.15e-43	1.14e-41
ADGRL3	-2.39333	1.4446	6.41e-43	1.42e-41
CYP2D6	-2.39673	1.40495	6.53e-43	1.44e-41
ARNTL2	2.48438	4.88404	7.14e-43	1.58e-41
CCNO	3.02871	3.44829	7.4e-43	1.63e-41
SNTB1	2.30388	6.01411	8.01e-43	1.76e-41
SALL2	-2.22715	1.31811	8.92e-43	1.96e-41
PCK1	-2.75529	6.18823	9.76e-43	2.14e-41
MT2A	-2.19864	6.37998	1.14e-42	2.5e-41
SPERT	7.02605	-0.152467	1.18e-42	2.57e-41
CD209	-2.33299	3.06384	1.24e-42	2.71e-41
ANO5	-3.10283	1.2513	1.48e-42	3.23e-41
GDNF	-2.15993	0.353544	1.5e-42	3.26e-41
CEND1	-2.31498	-1.22243	1.73e-42	3.74e-41
DSCC1	2.01274	3.9574	1.83e-42	3.95e-41
ITM2A	-2.08204	3.14882	2.13e-42	4.58e-41
MSRB3	-2.30743	4.64726	2.31e-42	4.95e-41
MPEG1	-2.04109	4.90798	2.37e-42	5.08e-41
IGSF10	-2.72697	0.878888	3.27e-42	6.99e-41
XDH	-2.32013	5.13084	3.54e-42	7.54e-41
ADAMTSL1	-2.06632	2.35551	4.43e-42	9.41e-41
FAM163B	-3.04956	-1.33092	5.31e-42	1.13e-40
ATP11A	2.16192	6.5774	6.29e-42	1.33e-40
SIGLEC11	-2.30952	-1.38945	6.65e-42	1.4e-40
KLK6	9.53361	4.89124	6.87e-42	1.44e-40
EPHA6	-3.72703	-1.78182	7.67e-42	1.61e-40
PSAT1	2.74789	5.97565	1.14e-41	2.37e-40
MMP7	7.16195	6.16531	1.35e-41	2.81e-40
CASR	-3.25608	-2.72655	1.41e-41	2.93e-40
MMRN1	-2.98337	2.43576	1.47e-41	3.05e-40
SORBS1	-2.1027	6.061	1.49e-41	3.08e-40
EGFL6	3.50559	1.92606	1.72e-41	3.55e-40
SLC16A12	-2.58223	-2.27743	1.88e-41	3.86e-40
CYP4B1	-2.82521	-0.732123	2.36e-41	4.83e-40
LEMD1	6.0873	2.0591	2.88e-41	5.89e-40
TESC	4.6433	5.8847	3.18e-41	6.49e-40
IGFL4	5.66999	1.34175	4.18e-41	8.52e-40
AC135586.2	-2.26372	-3.31514	5.69e-41	1.15e-39
KIF5A	-2.52778	0.94926	7.28e-41	1.47e-39
CTSG	-3.24676	0.682239	9.32e-41	1.87e-39
MMP11	4.37896	6.92433	1.04e-40	2.08e-39
CCDC152	-2.35912	0.901041	1.08e-40	2.17e-39
BMX	-2.29584	1.14165	1.18e-40	2.35e-39
SCUBE1	-2.10995	1.98562	1.37e-40	2.73e-39
CNTD2	4.91626	2.5585	1.38e-40	2.73e-39
CYBRD1	-2.03319	5.75686	1.54e-40	3.04e-39
CLU	-2.35532	6.33006	2.12e-40	4.19e-39
P2RY12	-2.68823	-1.07659	2.35e-40	4.63e-39
FEV	-3.76267	-1.12577	2.42e-40	4.75e-39
C2orf70	3.45625	2.44956	3.19e-40	6.22e-39
ASB5	-4.40985	-1.12204	3.52e-40	6.84e-39
LRAT	-3.31263	-1.46609	3.93e-40	7.63e-39
DDIAS	2.01892	3.37529	4.2e-40	8.12e-39
ADAMTS12	3.49948	4.53547	4.24e-40	8.2e-39
CHODL	-2.75408	-0.506189	4.35e-40	8.41e-39
LRRC8E	2.4933	0.227547	4.54e-40	8.75e-39
FLNA	-2.09267	9.86677	5.18e-40	9.94e-39
GLRA4	-2.78517	-0.889744	7.21e-40	1.38e-38
FCRL4	-3.03713	-1.86113	7.85e-40	1.5e-38
CTHRC1	3.87023	4.98798	1.13e-39	2.16e-38
NLGN1	-3.42405	-1.08752	1.14e-39	2.17e-38
ANKRD13B	2.41409	4.20019	2.35e-39	4.41e-38
NEU4	-2.44527	3.67849	2.43e-39	4.56e-38
MFAP4	-2.22221	5.67689	3.47e-39	6.48e-38
MASP1	-3.15558	2.55215	5.61e-39	1.04e-37
EYA2	-2.84554	2.5271	6.13e-39	1.14e-37
FOLR2	-2.31916	2.99454	6.97e-39	1.29e-37
PLA2G2C	-2.98496	-2.84864	7.81e-39	1.45e-37
MAPK15	4.37036	2.81132	7.9e-39	1.46e-37
MADCAM1	-2.40408	0.858823	8.32e-39	1.54e-37
HTR7	-2.33847	-1.37525	8.39e-39	1.55e-37
SPINK2	-2.95536	-1.24816	9.85e-39	1.81e-37
TCEAL7	-2.06053	0.747552	1.1e-38	2.02e-37
ABCA9	-2.63242	0.573166	1.2e-38	2.2e-37
TINCR	-2.84544	0.857393	1.21e-38	2.21e-37
THRB	-2.36974	3.21136	1.22e-38	2.24e-37
F13A1	-2.57913	4.36753	1.26e-38	2.3e-37
SMKR1	4.10983	0.926985	1.35e-38	2.47e-37
FOXD3	-3.27709	-2.0053	1.53e-38	2.78e-37
CES3	-2.17469	5.76522	1.58e-38	2.88e-37
CYS1	-2.10249	1.4719	2.11e-38	3.82e-37
TMEM130	-2.49403	-0.213859	2.23e-38	4.03e-37
PERM1	3.05192	0.720577	3.04e-38	5.46e-37
LGALS9C	-2.79768	2.38522	3.05e-38	5.48e-37
RYR3	-2.0758	0.662784	3.66e-38	6.56e-37
CLCNKB	-2.87461	-2.30705	4.02e-38	7.17e-37
ATG9B	3.5146	2.58847	4.12e-38	7.35e-37
ACAN	3.07312	3.29332	4.19e-38	7.47e-37
RGMA	-2.38557	3.31998	5.75e-38	1.02e-36
AKAP6	-2.03702	1.92089	5.8e-38	1.02e-36
STRA6	5.67741	3.66928	6.29e-38	1.11e-36
SETBP1	-2.01155	2.71383	8.37e-38	1.46e-36
CELSR1	2.45255	5.45644	9.1e-38	1.59e-36
SLC16A9	-2.28532	3.92728	1.08e-37	1.89e-36
KIAA2022	-3.16758	-0.814387	1.16e-37	2.01e-36
SFTA2	7.6785	1.7081	1.31e-37	2.26e-36
FXYD5	2.12474	6.92509	1.33e-37	2.29e-36
SAPCD2	2.06419	6.26364	1.51e-37	2.61e-36
NKD2	4.29368	4.64822	1.75e-37	3e-36
GRHL3	3.79553	2.40259	2.14e-37	3.66e-36
ATP6V0D2	-2.15459	0.696428	2.3e-37	3.93e-36
FBXO41	2.0598	4.47978	3.39e-37	5.76e-36
CASQ1	-2.48503	-1.74334	3.57e-37	6.06e-36
ZBTB16	-3.22061	0.409564	3.67e-37	6.23e-36
MFSD4A	-2.07582	3.9964	3.97e-37	6.71e-36
TREH	-2.47243	1.40432	4.73e-37	7.99e-36
GABRD	2.83802	0.622291	5.79e-37	9.76e-36
TNS4	3.45504	7.13283	5.92e-37	9.97e-36
WNT3	2.40452	1.87664	5.93e-37	9.99e-36
VIT	-2.5844	-0.74474	6.43e-37	1.08e-35
IRF4	-2.38068	2.80905	6.82e-37	1.14e-35
MEP1A	-2.47921	7.20604	9.04e-37	1.51e-35
KLB	-2.07552	0.0966749	9.15e-37	1.52e-35
C2CD4A	4.3302	4.77382	9.61e-37	1.6e-35
ISX	-2.4365	4.78874	1.16e-36	1.92e-35
NUGGC	-2.43191	0.310377	1.48e-36	2.44e-35
CLEC4G	-3.01074	-1.28625	1.78e-36	2.93e-35
WDR66	2.7298	1.6726	1.88e-36	3.09e-35
PMP2	-3.68794	-1.88818	2.34e-36	3.83e-35
MAP6	-2.09538	0.853309	2.86e-36	4.67e-35
UGT2A3	-3.23501	4.45465	2.88e-36	4.71e-35
ANGPTL7	-3.69722	-0.689647	3.32e-36	5.42e-35
HAGHL	3.60631	3.62894	3.57e-36	5.81e-35
PDLIM3	-2.09047	4.84966	3.8e-36	6.18e-35
GFRA3	-2.78568	0.370353	3.83e-36	6.21e-35
GDF15	3.22083	7.66616	4.26e-36	6.9e-35
STAB2	-2.07425	0.103878	5.02e-36	8.11e-35
RIMS4	-3.48845	-1.05278	5.19e-36	8.37e-35
UCN2	4.52055	-0.621662	5.3e-36	8.53e-35
DBNDD1	2.49335	4.66035	6.11e-36	9.83e-35
ANKS1B	-2.72287	-1.10028	6.36e-36	1.02e-34
NECAB1	-2.56951	0.261697	8.9e-36	1.42e-34
MMP27	-3.63716	-3.26359	9.43e-36	1.51e-34
TIMP1	2.0419	8.24732	1.07e-35	1.7e-34
ULBP1	3.95996	0.00264129	1.1e-35	1.75e-34
KRT23	7.17967	6.05332	1.27e-35	2.02e-34
BTBD16	3.62249	0.401008	1.31e-35	2.09e-34
RASGEF1C	-2.95373	-1.97209	1.34e-35	2.13e-34
KLC3	5.9118	0.268206	1.4e-35	2.21e-34
CASP5	-2.13517	3.00784	1.42e-35	2.25e-34
PHLDA1	2.68045	7.36359	1.44e-35	2.28e-34
KLHL35	3.99766	2.92784	1.62e-35	2.56e-34
SLC4A11	4.10834	3.19883	1.66e-35	2.62e-34
POU5F1B	4.6235	3.09629	2.03e-35	3.19e-34
GAD1	5.56307	2.00864	2.13e-35	3.34e-34
LONRF2	-3.3077	0.49861	2.21e-35	3.46e-34
SEC14L5	-2.36061	-0.377283	2.71e-35	4.24e-34
MACC1	2.32749	6.22014	3.27e-35	5.11e-34
TMEM255A	-2.19171	0.244264	3.39e-35	5.29e-34
CCL15-CCL14	-2.11089	-0.247334	3.41e-35	5.32e-34
PLA2G5	-2.34645	0.304361	3.65e-35	5.67e-34
ZNF835	-2.10006	-1.19139	5.56e-35	8.59e-34
FGFR2	-2.14115	4.44325	5.8e-35	8.95e-34
SCD	2.35493	9.06022	5.91e-35	9.12e-34
SFRP5	-3.66854	-0.047946	6.19e-35	9.53e-34
B3GALT5	-2.64031	5.45495	6.32e-35	9.73e-34
PDZK1	-2.41623	0.745288	6.83e-35	1.05e-33
CHL1	-2.38582	2.16356	7.14e-35	1.1e-33
RBM20	-2.47735	-0.359386	8.89e-35	1.36e-33
CPXM2	-2.35706	3.65863	1.11e-34	1.68e-33
STRIP2	2.55663	3.04717	1.13e-34	1.71e-33
ATCAY	-3.03114	-1.57915	1.16e-34	1.76e-33
GLS2	2.64946	0.293256	1.25e-34	1.89e-33
CELSR3	2.71848	4.5955	1.48e-34	2.23e-33
TCEAL2	-3.64821	0.00125488	1.87e-34	2.81e-33
TCEAL5	-3.26834	-2.56703	2.39e-34	3.57e-33
SIGLEC8	-2.26664	0.0749691	2.48e-34	3.7e-33
SMIM28	-3.54582	-2.96215	2.5e-34	3.73e-33
CCDC78	3.64369	1.91891	2.53e-34	3.76e-33
NOTUM	9.42395	6.25593	2.55e-34	3.79e-33
LRRC3B	-3.08222	-3.32046	3.17e-34	4.69e-33
STUM	-3.10852	2.03478	3.47e-34	5.13e-33
CST2	6.11212	0.83918	4.17e-34	6.13e-33
IGSF11	-2.94854	-1.77604	4.61e-34	6.76e-33
RNF183	3.3001	2.48146	4.72e-34	6.91e-33
BAALC	-2.17224	-0.354449	5.19e-34	7.57e-33
GCNT4	-2.17242	1.1742	6.06e-34	8.82e-33
PCOLCE2	-3.06134	1.17273	6.18e-34	9e-33
HBB	-2.59671	4.60237	6.57e-34	9.54e-33
PRDM12	2.86635	-1.42499	6.95e-34	1.01e-32
SLITRK3	-3.53575	-1.18551	7.05e-34	1.02e-32
PABPC1L	3.04035	4.83163	7.92e-34	1.14e-32
TRIM9	-2.37302	0.418266	8.36e-34	1.21e-32
C14orf132	-2.00709	2.74548	8.53e-34	1.23e-32
FMN2	-3.26136	0.0277592	9.3e-34	1.34e-32
CD36	-2.34858	3.63476	1.02e-33	1.47e-32
GRHL1	2.36427	2.69849	1.04e-33	1.5e-32
CDHR2	-2.30594	5.99739	1.08e-33	1.55e-32
HSPB7	-2.70336	3.06801	1.15e-33	1.64e-32
CCL28	-2.07266	5.17567	1.16e-33	1.66e-32
ASCL2	3.91992	6.85225	1.23e-33	1.76e-32
PRR36	4.04695	3.12495	1.55e-33	2.2e-32
STPG4	4.5	-0.436915	1.8e-33	2.55e-32
FABP1	-2.77675	9.24968	1.85e-33	2.62e-32
ULBP3	2.11787	0.766445	1.89e-33	2.66e-32
MSX1	3.41136	2.87917	1.93e-33	2.72e-32
RGS16	2.27243	4.34141	2.26e-33	3.17e-32
MEX3A	2.88106	4.03381	2.35e-33	3.29e-32
SLC9A2	-2.08769	4.84497	2.5e-33	3.5e-32
GALR1	-3.36972	-2.60169	3.49e-33	4.86e-32
FCRLA	-2.71536	0.494174	3.5e-33	4.87e-32
C1QTNF7	-2.49675	0.964698	4.06e-33	5.63e-32
NOS1	-3.21418	0.101918	4.38e-33	6.06e-32
FCER1A	-2.36455	-0.0922949	5.63e-33	7.74e-32
CD160	-2.13682	-0.36225	5.73e-33	7.87e-32
CORO2B	-2.15589	0.699039	6.45e-33	8.84e-32
RERG	-2.15757	2.06171	6.93e-33	9.48e-32
OXTR	2.86114	1.30276	6.96e-33	9.52e-32
PPP1R3C	-2.18356	1.59105	7.41e-33	1.01e-31
PGR	-2.37944	0.564425	8.11e-33	1.1e-31
RECQL4	2.22673	5.55136	1.1e-32	1.49e-31
CHRDL1	-2.97238	3.66365	1.11e-32	1.5e-31
RND2	-2.15492	-0.376235	1.14e-32	1.55e-31
ATRNL1	-2.81598	0.0196684	1.17e-32	1.58e-31
SLC8A2	-2.82456	0.330925	1.2e-32	1.61e-31
RAB9B	-2.03224	0.507764	1.45e-32	1.94e-31
ATP13A4	-2.4548	0.523487	1.85e-32	2.47e-31
SLC35F1	-2.00128	-0.334797	1.95e-32	2.6e-31
LGI4	-2.11211	2.4084	1.96e-32	2.62e-31
ADAM33	-2.16496	1.99119	2.55e-32	3.39e-31
ACSM5	-2.48561	-1.43841	2.7e-32	3.58e-31
FAM227A	2.4806	1.36947	2.87e-32	3.81e-31
ASTN1	-3.31191	-1.48111	2.94e-32	3.89e-31
ZNF229	-2.05043	-0.783041	3.04e-32	4.02e-31
KCNK3	-2.84695	0.525235	3.08e-32	4.07e-31
CD79B	-2.12143	1.9461	3.48e-32	4.57e-31
RIC3	-2.69468	-0.769867	4.19e-32	5.47e-31
COL7A1	3.19789	5.28132	4.67e-32	6.09e-31
TLX1	3.99751	1.99749	4.77e-32	6.22e-31
CNTNAP3	-2.53266	-0.933476	4.81e-32	6.27e-31
HTR3E	-3.3032	-1.37763	5.32e-32	6.91e-31
SLC7A14	-3.49701	-1.25536	5.98e-32	7.75e-31
NPAS4	-2.53287	-2.49905	6.15e-32	7.97e-31
KIF5C	-2.01999	1.05527	7.98e-32	1.03e-30
GPER1	-2.11799	1.81838	8.4e-32	1.08e-30
KRT9	-3.00793	-2.81771	1.19e-31	1.52e-30
GCSAML	-2.33763	-1.38981	1.29e-31	1.64e-30
FEZF1	8.19439	1.34848	1.48e-31	1.88e-30
STC2	3.64574	4.77938	1.8e-31	2.28e-30
LGALS2	-2.48134	3.41896	1.91e-31	2.42e-30
TMEM105	2.74592	1.09679	1.94e-31	2.46e-30
IRX5	4.49111	0.285876	2e-31	2.53e-30
VSNL1	2.79019	4.98314	2.07e-31	2.61e-30
SEMA3E	-3.41766	-0.0604575	2.15e-31	2.71e-30
GRIA4	-2.51082	-1.0732	2.23e-31	2.81e-30
RNF43	2.29834	8.14664	2.49e-31	3.13e-30
FAM163A	-2.05431	-0.912437	2.58e-31	3.24e-30
RNFT2	2.00643	2.18412	3.44e-31	4.31e-30
PCDH10	-2.88383	-1.67057	3.59e-31	4.49e-30
HOMER1	2.16639	3.29844	3.87e-31	4.82e-30
HTR4	-2.84344	0.336436	4.92e-31	6.12e-30
BMP5	-2.55692	1.5252	5.64e-31	6.98e-30
GRIN2B	3.54025	3.04752	6.16e-31	7.61e-30
ULBP2	4.37566	1.25152	8.36e-31	1.02e-29
GNG8	-2.38596	-2.62041	8.51e-31	1.04e-29
CD79A	-2.45625	3.60901	8.8e-31	1.08e-29
STK31	3.82694	1.87697	1.13e-30	1.38e-29
SI	-3.22154	4.6699	1.16e-30	1.41e-29
S100A2	4.30682	3.42223	1.3e-30	1.58e-29
RELN	-2.54244	1.11463	1.3e-30	1.58e-29
LY9	-2.0522	0.970653	1.39e-30	1.68e-29
SGCA	-2.42763	1.07409	1.72e-30	2.08e-29
SCG2	-2.23618	2.17479	2e-30	2.4e-29
CLDN2	5.50177	7.46882	2.14e-30	2.57e-29
DMD	-2.0231	4.02071	2.32e-30	2.78e-29
FAM189A2	-2.1761	0.501999	2.33e-30	2.79e-29
MYBL2	2.12855	6.88733	2.34e-30	2.8e-29
ADAM12	4.25758	4.65739	3.3e-30	3.93e-29
GJB4	4.07984	2.14536	3.65e-30	4.35e-29
BEND4	-2.4699	-1.54993	4.18e-30	4.97e-29
SHISA2	3.1978	2.08301	4.42e-30	5.24e-29
KLK8	8.50742	1.60549	4.63e-30	5.48e-29
NXPE4	-2.88567	5.40371	5.31e-30	6.27e-29
DPEP3	-2.49895	-2.58614	6.33e-30	7.44e-29
SLC7A11	2.87667	4.80646	7.11e-30	8.34e-29
TRHDE	-2.32329	1.37583	7.28e-30	8.54e-29
AZGP1	3.14356	6.26499	7.55e-30	8.85e-29
AARD	-2.29985	-1.85188	7.89e-30	9.24e-29
GDPD5	2.72916	5.23635	8.16e-30	9.54e-29
DMBX1	5.985	-0.0951822	8.3e-30	9.7e-29
ADCY2	-2.00589	0.71319	9.9e-30	1.15e-28
COL21A1	-2.02323	0.424063	9.92e-30	1.16e-28
MAOB	-2.37508	3.53023	1.09e-29	1.27e-28
PROKR1	-2.64635	-3.02234	1.15e-29	1.34e-28
PTPRZ1	-2.99327	-0.279542	1.16e-29	1.34e-28
NPFFR1	3.4466	1.99612	1.32e-29	1.52e-28
PRELP	-2.55013	4.51929	1.43e-29	1.65e-28
KLK7	8.46022	2.88797	1.57e-29	1.8e-28
C1orf186	-2.17211	-0.156091	2.2e-29	2.51e-28
CCR2	-2.10016	1.45481	2.27e-29	2.58e-28
ADRA1A	-2.6052	-2.50312	2.51e-29	2.84e-28
PMAIP1	2.16531	3.9321	2.52e-29	2.85e-28
IL11	4.51768	2.24396	2.89e-29	3.26e-28
BRCA2	2.13146	4.22797	2.92e-29	3.29e-28
TG	4.29102	3.43843	3.12e-29	3.51e-28
SULT2B1	2.9099	4.74374	4.1e-29	4.59e-28
GPR3	2.58514	0.786514	4.18e-29	4.68e-28
STAP1	-2.26	-0.547109	5.32e-29	5.93e-28
RASD2	-2.00776	3.51631	5.39e-29	6e-28
NRSN1	-3.03411	-2.50011	5.75e-29	6.39e-28
HIF3A	-2.26589	1.64935	6.08e-29	6.74e-28
ASCL5	4.09968	0.791288	7.62e-29	8.42e-28
SYNGR1	-2.00612	1.98905	7.73e-29	8.54e-28
CYP2C18	-2.20451	1.96154	7.84e-29	8.66e-28
LRCH2	-2.01409	0.801711	9.29e-29	1.02e-27
VSIG2	-2.74563	5.34367	9.3e-29	1.02e-27
HAND1	-3.92428	1.16401	9.88e-29	1.08e-27
POU3F4	-3.86659	-3.2987	1.6e-28	1.74e-27
SERPINA4	6.43814	0.591576	1.62e-28	1.76e-27
SIGLEC6	-2.23713	-1.22573	1.81e-28	1.97e-27
CCL8	-2.41159	1.32462	1.85e-28	2.01e-27
MFAP5	-2.41207	3.33083	2.07e-28	2.25e-27
NEXN	-2.0332	3.57763	2.35e-28	2.54e-27
CCDC150	2.111	1.63302	2.51e-28	2.71e-27
ZNF695	2.2158	0.965269	2.73e-28	2.95e-27
UNC5D	-2.64589	-1.92846	3.04e-28	3.27e-27
CST4	6.39214	-0.822425	3.85e-28	4.12e-27
CXCL3	3.02846	5.64176	4.02e-28	4.3e-27
CA9	5.6985	5.76351	4.1e-28	4.38e-27
KLK10	5.16981	5.79745	4.21e-28	4.49e-27
CFD	-2.27444	5.11381	4.29e-28	4.57e-27
MMP3	4.76001	5.59185	4.49e-28	4.78e-27
CORIN	3.37709	1.36152	4.78e-28	5.08e-27
PLEKHG4	2.03079	5.46913	5.03e-28	5.33e-27
TFR2	2.83367	2.40619	5.39e-28	5.71e-27
CNTN3	-2.57239	1.06081	6.82e-28	7.18e-27
ZBTB7C	-2.10052	4.80391	7.05e-28	7.42e-27
MT1E	-2.27158	5.78869	7.67e-28	8.05e-27
NWD2	-2.46648	-0.878349	7.82e-28	8.2e-27
WISP1	2.72276	3.10806	1.15e-27	1.19e-26
ENTPD8	-2.30383	4.82064	1.37e-27	1.42e-26
CFAP45	2.21108	0.113069	1.38e-27	1.43e-26
CLDN11	-2.11282	0.970526	1.38e-27	1.43e-26
SLC17A1	-2.45966	-2.40554	1.58e-27	1.63e-26
GHR	-2.09127	1.96942	1.64e-27	1.69e-26
CCL13	-2.5487	1.74144	1.81e-27	1.86e-26
SP5	3.68318	3.85906	1.9e-27	1.96e-26
IBSP	6.30313	0.23431	1.96e-27	2.02e-26
SLC4A10	-2.91504	0.335149	1.99e-27	2.04e-26
TEX45	2.45463	2.13155	2.02e-27	2.07e-26
CD22	-2.3843	2.05551	2.2e-27	2.25e-26
SHH	2.19601	4.82704	2.39e-27	2.45e-26
KIF26B	3.29379	3.94554	2.57e-27	2.62e-26
VPREB3	-2.29626	-0.107644	3.13e-27	3.17e-26
GPR119	-3.32873	-3.56877	3.17e-27	3.21e-26
KCNA1	-3.33138	-2.19181	3.96e-27	4e-26
CYSRT1	2.63708	0.52606	4.01e-27	4.05e-26
FANCB	2.07146	1.36763	4.08e-27	4.12e-26
COMP	6.00854	4.45994	4.15e-27	4.19e-26
SCN3A	-2.04484	-0.204408	4.63e-27	4.65e-26
PALD1	2.03356	5.58349	5.28e-27	5.3e-26
SELENBP1	-2.00959	8.69027	5.37e-27	5.38e-26
LZTS3	2.2193	5.37107	5.77e-27	5.77e-26
RAET1L	3.94056	0.643535	7.07e-27	7.01e-26
DSG4	2.49475	0.301069	7.17e-27	7.11e-26
LMTK3	2.11869	3.03549	7.22e-27	7.16e-26
C8orf46	-2.32433	-2.20441	7.39e-27	7.32e-26
PLAU	2.12032	6.18267	7.78e-27	7.7e-26
APELA	3.31231	-1.27469	8.58e-27	8.47e-26
ANOS1	3.145	3.2522	9.25e-27	9.11e-26
KY	-2.27172	-1.76841	9.53e-27	9.38e-26
PGGHG	3.13198	6.40344	1.24e-26	1.21e-25
MLXIPL	2.81161	5.45693	1.31e-26	1.28e-25
CILP	-2.74468	3.02449	1.55e-26	1.51e-25
SYT10	-3.10895	-2.62904	1.98e-26	1.92e-25
PPEF1	3.02202	-0.951922	2.03e-26	1.97e-25
AC008878.3	-2.83611	-3.29791	2.34e-26	2.27e-25
ATP6V1C2	2.41272	3.21906	2.38e-26	2.3e-25
SNAP91	-2.85998	-1.41017	2.44e-26	2.35e-25
EFHC2	-2.20771	-0.514862	2.55e-26	2.46e-25
TRPC7	-2.26002	-2.35638	3.05e-26	2.92e-25
TLR10	-2.15772	0.210016	3.13e-26	3e-25
EPHA5	-2.61237	-2.5046	3.27e-26	3.12e-25
SRPX2	3.05797	5.02137	3.6e-26	3.44e-25
MMP1	4.51182	6.94377	3.68e-26	3.51e-25
WNT7B	6.06079	1.12336	5.85e-26	5.53e-25
MYPN	-2.36155	-0.72034	7.06e-26	6.64e-25
SCGB2A1	-2.57601	-0.0938737	8.38e-26	7.85e-25
TNNI3	4.85972	0.883852	9.42e-26	8.81e-25
SLC22A3	2.05372	4.5368	9.54e-26	8.91e-25
XKRX	2.52642	2.83865	9.83e-26	9.18e-25
ALKAL1	3.6561	0.928139	1.03e-25	9.63e-25
ASPHD1	2.46789	3.28802	1.05e-25	9.81e-25
SLC27A6	-2.70593	-1.93392	1.08e-25	1.01e-24
BHMT2	-2.03831	0.0875769	1.13e-25	1.05e-24
LY6G6E	5.31943	-1.44268	1.2e-25	1.11e-24
MFAP2	2.40518	4.29177	1.26e-25	1.17e-24
TLL1	-2.23615	0.0625842	1.33e-25	1.23e-24
SLC15A1	-2.83249	2.80526	1.36e-25	1.26e-24
WSCD2	-2.65038	-0.584682	1.47e-25	1.36e-24
NKPD1	3.20147	-0.175777	1.5e-25	1.38e-24
HOXD1	-2.20468	-0.326302	1.55e-25	1.43e-24
TACSTD2	4.86016	5.43183	1.79e-25	1.64e-24
TCN1	7.41088	4.79001	1.88e-25	1.72e-24
FCER2	-2.86204	-0.0208589	2.01e-25	1.84e-24
CARD14	2.19523	2.27659	2.02e-25	1.85e-24
AC025594.3	2.25384	2.29465	2.1e-25	1.91e-24
GALNT15	-2.02237	1.80588	2.2e-25	2.01e-24
OSR1	-2.24791	0.819013	2.23e-25	2.03e-24
ROPN1	-2.96533	-2.90255	2.26e-25	2.05e-24
C5orf46	5.87879	-0.562542	2.48e-25	2.25e-24
CXCL1	2.95342	6.4231	3.16e-25	2.85e-24
PCSK9	2.761	6.18837	3.26e-25	2.94e-24
KCNA3	-2.11707	-0.186779	3.36e-25	3.03e-24
GPR88	-2.33478	-2.24402	3.76e-25	3.38e-24
TMEM74	-2.09657	-2.23018	4.03e-25	3.61e-24
COL4A6	-2.17603	0.530388	4.05e-25	3.63e-24
SPTBN5	3.11737	2.97869	4.38e-25	3.92e-24
NOX4	3.24789	1.5047	5.16e-25	4.61e-24
DNAH2	2.99711	2.59772	5.24e-25	4.68e-24
ENAM	-2.59763	-1.33119	5.4e-25	4.81e-24
FAP	3.3319	3.80524	5.41e-25	4.81e-24
LEF1	2.14685	3.95568	6.08e-25	5.4e-24
TNFSF9	3.76246	3.42298	6.49e-25	5.75e-24
ALKAL2	-2.02561	-0.286907	7.13e-25	6.29e-24
CELF4	-2.3839	-1.49674	7.69e-25	6.77e-24
LRRC36	3.34486	1.93959	7.98e-25	7.03e-24
NCR2	-2.59776	-3.43616	8.61e-25	7.56e-24
NKD1	4.17057	6.58207	9.1e-25	7.98e-24
AGXT2	-3.18757	-3.08352	9.68e-25	8.49e-24
CALY	-2.57593	-1.48906	1.01e-24	8.83e-24
ABCB5	-3.04359	-1.63005	1.06e-24	9.29e-24
DKK4	8.50286	2.69078	1.1e-24	9.57e-24
SPHKAP	-3.16685	-3.30452	1.19e-24	1.04e-23
ENPP7	-3.02828	-2.12525	1.28e-24	1.11e-23
AADAC	-2.87299	0.508823	1.38e-24	1.2e-23
CXCR5	-2.62244	-2.09317	1.52e-24	1.32e-23
SLCO1B3	6.41337	2.16182	1.94e-24	1.67e-23
TCF24	4.25215	-1.62709	2.02e-24	1.74e-23
NECTIN4	2.04315	4.36973	2.08e-24	1.78e-23
SOX14	7.18694	0.818704	2.08e-24	1.79e-23
GCNT3	-2.05178	7.1409	2.76e-24	2.36e-23
LUZP2	-2.20828	-0.0569355	3.17e-24	2.7e-23
AADACL2	-3.55127	-2.91537	3.18e-24	2.71e-23
KRT75	7.10924	1.00881	3.35e-24	2.85e-23
LY6G6F	5.16776	-1.72169	3.67e-24	3.11e-23
AMELX	5.08872	-1.3383	3.74e-24	3.17e-23
C8orf74	6.14019	-1.59207	3.79e-24	3.21e-23
MYEOV	3.00314	5.04123	4.46e-24	3.76e-23
IL23A	3.02114	1.8081	5.48e-24	4.6e-23
CHST5	-2.45148	2.56801	6.39e-24	5.36e-23
MROH6	2.28279	5.17252	7.23e-24	6.04e-23
CLEC5A	3.65524	1.87054	7.77e-24	6.48e-23
SYT4	-3.0863	-1.14725	8.41e-24	7.01e-23
PENK	-3.11258	-0.212673	8.57e-24	7.13e-23
SH2D6	-2.28813	0.416925	8.67e-24	7.21e-23
KRT17	5.07634	4.97393	1.01e-23	8.39e-23
CLEC4M	-2.94866	-3.28505	1.02e-23	8.45e-23
AXIN2	2.44774	7.25241	1.15e-23	9.5e-23
DHRS2	4.64137	2.31007	1.3e-23	1.07e-22
CHRM2	-3.44894	1.31207	1.33e-23	1.09e-22
ACKR1	-2.20617	3.11838	1.41e-23	1.16e-22
SSTR3	-2.16462	-1.82551	1.42e-23	1.16e-22
PHF24	-2.16563	-1.98662	1.59e-23	1.3e-22
MSH5	2.02198	2.4453	1.61e-23	1.32e-22
LCN6	-2.60129	-2.40862	1.64e-23	1.34e-22
SERPINA9	-3.52391	-1.5465	1.68e-23	1.37e-22
AKR1C4	5.36554	0.354386	1.94e-23	1.58e-22
UCN	2.26162	-0.102046	2.05e-23	1.67e-22
BLK	-2.38502	0.430409	2.09e-23	1.7e-22
PKP1	3.97922	3.72412	2.12e-23	1.72e-22
FGFRL1	2.43515	6.62454	2.18e-23	1.76e-22
SMCO2	2.59458	-1.70458	2.31e-23	1.87e-22
TMPRSS13	3.30894	3.46509	2.41e-23	1.95e-22
UGT1A1	-2.87583	-0.120563	2.44e-23	1.97e-22
SYNDIG1L	-2.27955	-2.59707	2.47e-23	2e-22
LCN10	-2.53729	-2.82004	2.61e-23	2.11e-22
MAPT	-2.14116	1.30415	2.91e-23	2.35e-22
MB	-2.1556	2.12372	2.98e-23	2.4e-22
FCRL2	-2.24294	0.2199	3.85e-23	3.08e-22
OLR1	3.85489	2.73465	3.88e-23	3.1e-22
TMEM74B	2.90509	2.90786	5.3e-23	4.19e-22
CNTN1	-2.52239	0.975659	5.38e-23	4.25e-22
NAP1L6	-2.42899	-3.13779	5.63e-23	4.44e-22
CLDN16	2.95961	0.0314655	5.82e-23	4.59e-22
PTCHD1	-2.70866	0.207129	6.12e-23	4.81e-22
SHROOM4	2.01002	4.76233	7.21e-23	5.65e-22
DUSP4	3.57171	5.8004	8.27e-23	6.46e-22
SLC17A9	2.44567	5.7971	1.24e-22	9.61e-22
WDR17	-2.41968	-1.04723	1.31e-22	1.01e-21
SPOCD1	2.30156	1.58622	1.43e-22	1.1e-21
ACBD7	2.11427	0.21304	1.43e-22	1.11e-21
ABCA6	-2.10047	0.916839	1.55e-22	1.19e-21
S100P	2.49666	8.01658	1.58e-22	1.21e-21
C20orf144	2.24393	-1.02724	1.62e-22	1.24e-21
BGN	2.53285	8.03581	1.65e-22	1.26e-21
SERPINB5	3.6536	6.22718	1.77e-22	1.36e-21
MMP13	5.44513	1.20995	1.82e-22	1.4e-21
AC136428.1	-2.56037	-1.04552	1.84e-22	1.41e-21
CEL	5.94682	5.33904	1.88e-22	1.44e-21
CACNG8	3.61049	0.230037	1.93e-22	1.48e-21
ZIC5	8.16109	1.65371	1.94e-22	1.49e-21
KCNH8	2.61083	2.42948	1.98e-22	1.51e-21
ASB9	2.23421	3.17117	2.03e-22	1.55e-21
MS4A2	-2.01494	0.711314	2.04e-22	1.56e-21
GBX2	5.46524	-1.27183	2.26e-22	1.72e-21
DNASE1L2	2.53826	0.380294	2.33e-22	1.77e-21
UGT1A5	-3.5026	-3.61167	2.41e-22	1.83e-21
TDGF1	3.06949	4.828	2.49e-22	1.89e-21
PNOC	-2.06173	-0.474595	2.51e-22	1.91e-21
ERFE	3.37069	1.49604	2.57e-22	1.95e-21
DLX4	2.39547	-0.128518	2.62e-22	1.99e-21
GOLGA7B	2.47576	3.23056	2.63e-22	1.99e-21
NBEA	-2.08033	1.88549	2.89e-22	2.19e-21
CNR2	-2.17394	-1.08199	2.92e-22	2.21e-21
ARID3A	2.12053	5.60967	3.04e-22	2.3e-21
PCDH11Y	-3.27736	-3.53103	3.83e-22	2.88e-21
TMEM179	-2.62286	-1.09519	4.46e-22	3.34e-21
C10orf105	-2.17529	-3.18126	4.63e-22	3.46e-21
TFAP2A	3.5231	2.90662	4.72e-22	3.53e-21
ARPP21	-2.95003	-2.99714	4.8e-22	3.58e-21
TMPRSS3	2.9857	3.95601	4.9e-22	3.66e-21
GSDMC	2.93826	-1.04693	5.47e-22	4.06e-21
DNER	-2.40604	-0.000673459	5.6e-22	4.16e-21
CNKSR2	-2.0397	-1.0119	5.61e-22	4.16e-21
ACSL6	4.37752	4.63108	8.4e-22	6.17e-21
SPOCK3	-3.10875	-1.89322	8.82e-22	6.47e-21
ASB11	-2.61906	-3.44921	9.18e-22	6.73e-21
NXPH4	5.80159	3.14961	9.38e-22	6.87e-21
SNAP25	-2.49378	0.00589113	1.02e-21	7.41e-21
ZIC2	6.09833	2.84762	1.03e-21	7.47e-21
NXPE1	-2.23395	4.47255	1.12e-21	8.12e-21
AL132639.3	-2.23736	-3.05486	1.17e-21	8.53e-21
ADAMTS2	2.39939	5.62159	1.51e-21	1.09e-20
HMGCS2	-2.30025	8.09163	1.69e-21	1.22e-20
HBA2	-2.06715	2.33945	1.79e-21	1.28e-20
COL6A5	-2.59522	-1.38045	1.85e-21	1.33e-20
MZB1	-2.00747	4.15494	1.9e-21	1.36e-20
SIX1	3.57102	-0.0882042	1.95e-21	1.4e-20
HSF4	2.01704	3.49482	2.11e-21	1.51e-20
NANOS3	3.87466	1.09559	2.44e-21	1.73e-20
SLAMF9	3.71125	-0.685977	2.55e-21	1.81e-20
COL1A1	2.6594	11.3706	2.86e-21	2.03e-20
PAX9	3.13866	1.39695	3.1e-21	2.19e-20
GABRE	2.34521	5.16519	3.43e-21	2.42e-20
CUX2	-2.27698	-2.42271	3.43e-21	2.42e-20
RPH3A	-2.25938	-2.27395	3.49e-21	2.46e-20
LGR5	2.88697	6.34509	3.73e-21	2.62e-20
ENTPD3	-2.03748	0.569752	4.52e-21	3.16e-20
WT1	4.83309	1.12856	7e-21	4.83e-20
DIRAS2	-2.31232	-2.04862	7.11e-21	4.9e-20
GPIHBP1	-2.02341	-0.50622	7.38e-21	5.08e-20
DSCAML1	-2.24467	-0.143285	7.96e-21	5.47e-20
DUSP27	7.59377	5.52885	8.3e-21	5.69e-20
CIDEC	-2.19086	2.01794	8.52e-21	5.84e-20
MIA2	-2.08138	-2.07044	9.23e-21	6.31e-20
TMEM249	3.91089	-0.283539	9.52e-21	6.5e-20
STC1	2.07823	3.95856	1e-20	6.84e-20
EPYC	7.07097	1.07632	1.01e-20	6.89e-20
CR2	-2.60305	2.64751	1.07e-20	7.31e-20
KIAA0408	-2.63383	-3.04528	1.18e-20	8.02e-20
NEK5	2.2392	1.84564	1.42e-20	9.62e-20
PAH	5.60491	2.0682	1.53e-20	1.03e-19
BRINP3	-3.27542	1.20869	1.59e-20	1.07e-19
RELL2	2.08987	2.0024	1.61e-20	1.08e-19
RFX8	2.88789	-1.59214	1.66e-20	1.12e-19
PTK7	2.09802	6.68758	1.87e-20	1.25e-19
HS6ST2	3.59284	4.09695	2.18e-20	1.46e-19
VWC2	-2.18253	-1.67646	2.24e-20	1.49e-19
PTP4A3	2.25521	6.03017	2.48e-20	1.65e-19
INA	-2.48398	-0.238526	2.61e-20	1.73e-19
CHI3L1	2.85218	4.98287	2.62e-20	1.74e-19
MS4A8	-2.01734	3.47179	2.62e-20	1.74e-19
SPP1	4.06459	7.44881	2.69e-20	1.78e-19
BEX1	-2.4917	-0.774132	2.74e-20	1.81e-19
FOXP2	-2.08531	2.69279	2.82e-20	1.86e-19
SHISA3	-2.13791	0.95148	3.36e-20	2.21e-19
C6orf15	7.4164	1.70301	3.88e-20	2.54e-19
CLVS2	-2.76289	-2.39603	3.9e-20	2.55e-19
MGAT4C	-2.82218	-2.25436	4.2e-20	2.75e-19
WBSCR28	2.45811	-1.39993	4.8e-20	3.13e-19
AMH	4.1951	2.05786	4.89e-20	3.18e-19
AC026461.4	-2.40079	-3.39799	5.57e-20	3.62e-19
TBX15	2.93376	-0.137197	5.6e-20	3.64e-19
KRT6B	5.4118	4.02508	5.85e-20	3.79e-19
FOSL1	2.64347	4.16305	5.86e-20	3.8e-19
SLC11A1	2.46537	3.38965	6.15e-20	3.98e-19
AC009163.2	-2.38962	-2.0276	6.28e-20	4.06e-19
CCL21	-2.03253	4.27487	6.32e-20	4.08e-19
SLC35D3	4.41121	2.79919	7.36e-20	4.74e-19
DNAH5	2.48951	0.912757	7.63e-20	4.91e-19
RPL22L1	2.12633	6.10534	9.04e-20	5.8e-19
KRT222	-2.45216	-2.77816	1.01e-19	6.47e-19
KCNG3	-2.14667	-1.32076	1.04e-19	6.66e-19
HTR3A	-2.41366	-1.03308	1.05e-19	6.73e-19
OLFM3	-2.7886	-2.03118	1.21e-19	7.69e-19
RPL10L	-2.01448	-1.2144	1.25e-19	7.96e-19
SCRG1	-2.64403	-0.0953653	1.33e-19	8.45e-19
SLITRK2	-2.34261	-2.23413	1.5e-19	9.49e-19
COL19A1	-2.469	-2.21109	1.57e-19	9.92e-19
PLD5	-2.6709	-2.98549	1.71e-19	1.08e-18
CLEC17A	-2.23316	-1.3013	1.77e-19	1.12e-18
GSG1L	-2.52712	-2.68986	1.93e-19	1.21e-18
GJC3	2.58619	-0.518174	2.01e-19	1.26e-18
LPO	4.5955	-0.223024	2.03e-19	1.27e-18
NEFL	-2.70959	0.656459	2.35e-19	1.47e-18
ADAMTS6	2.3031	1.51879	2.51e-19	1.57e-18
CCL19	-2.24855	2.21276	2.72e-19	1.7e-18
MS4A1	-2.47272	2.06303	2.73e-19	1.7e-18
CPA4	3.75211	-1.09856	3.14e-19	1.94e-18
GFI1B	-2.21377	-0.91145	4.11e-19	2.53e-18
SLC22A11	4.52585	1.54939	4.27e-19	2.63e-18
ST8SIA3	-2.88385	-2.34217	4.33e-19	2.66e-18
CXCL2	2.40146	4.7585	4.5e-19	2.76e-18
CBARP	2.53514	0.654489	4.98e-19	3.05e-18
AC112484.1	2.21585	0.2907	5.37e-19	3.28e-18
FNDC11	2.54881	0.330929	5.71e-19	3.49e-18
KRTAP5-4	3.61857	-2.42643	5.84e-19	3.56e-18
DIO2	2.02521	3.46913	5.87e-19	3.58e-18
HOXB8	2.81073	5.24741	6.02e-19	3.67e-18
PGC	5.11403	1.35679	6.44e-19	3.93e-18
EN2	6.17085	1.07757	6.48e-19	3.95e-18
TP73	2.32039	2.43748	7.13e-19	4.33e-18
IGFL1	8.27665	0.265795	7.2e-19	4.36e-18
PAPPA2	-2.229	-0.450204	7.23e-19	4.38e-18
CCDC148	2.32119	-0.816188	7.88e-19	4.77e-18
RP1	5.34035	-1.54594	8.48e-19	5.12e-18
PIWIL1	5.11216	3.17327	8.66e-19	5.23e-18
NLRP7	-2.03433	-1.70167	8.74e-19	5.27e-18
CLDN14	3.14796	0.677038	9.54e-19	5.74e-18
TCL1A	-2.86581	0.443649	9.75e-19	5.85e-18
ASGR1	2.56124	2.25023	1.13e-18	6.74e-18
TMEM211	3.73625	1.99554	1.14e-18	6.83e-18
PLIN4	-2.689	3.95987	1.23e-18	7.34e-18
RIPPLY3	3.63538	0.463335	1.31e-18	7.82e-18
DCAF12L2	-2.42897	-3.18416	1.34e-18	7.99e-18
HEPACAM2	-2.39588	4.64333	1.37e-18	8.17e-18
SULT1C2	2.97581	3.87995	1.39e-18	8.29e-18
SAPCD1	2.13923	-0.0788272	1.63e-18	9.63e-18
CDKN2A	2.94463	3.28131	1.84e-18	1.09e-17
DUSP9	4.30799	-0.15716	2.16e-18	1.27e-17
HTR1D	2.83739	3.29082	2.34e-18	1.37e-17
SLC30A8	-2.43988	-2.86048	2.37e-18	1.39e-17
GLYATL1	3.08995	1.28762	2.39e-18	1.41e-17
LRRN4	2.98955	-1.16205	2.45e-18	1.44e-17
KRT7	3.84596	3.92949	2.58e-18	1.51e-17
DEFB1	-2.02761	1.98947	2.75e-18	1.61e-17
ELF5	7.73156	1.78119	2.96e-18	1.73e-17
SLC13A3	4.25819	3.20228	3.11e-18	1.82e-17
GABRG2	-2.93244	-2.28211	3.19e-18	1.87e-17
SPDYC	3.72327	-0.183311	3.54e-18	2.06e-17
AL662899.2	5.73979	3.24456	3.8e-18	2.21e-17
SPX	-2.02524	-2.86906	3.87e-18	2.25e-17
ZNF280A	4.75507	-2.03506	4.17e-18	2.42e-17
CXCL8	3.93514	7.20921	4.82e-18	2.78e-17
BMP7	3.26721	5.33924	5.25e-18	3.02e-17
LY6G6C	3.14753	0.607812	5.31e-18	3.05e-17
LGALS9B	-2.02992	1.90083	7.45e-18	4.24e-17
PNPLA3	3.69662	0.767539	7.5e-18	4.27e-17
XPNPEP2	-2.26325	4.36705	8.1e-18	4.61e-17
SNTG2	-2.14906	-2.52797	8.15e-18	4.64e-17
MATN3	2.67071	1.59696	9.19e-18	5.21e-17
ZMAT4	-2.51313	-2.74145	9.81e-18	5.56e-17
C14orf105	6.25844	-0.727162	9.88e-18	5.59e-17
IL1A	3.16112	1.65065	9.91e-18	5.61e-17
ALDH3B2	3.57941	1.37569	1.05e-17	5.97e-17
DACH1	2.11927	5.14383	1.13e-17	6.38e-17
CXCL5	5.24004	5.26927	1.13e-17	6.39e-17
GRIN2A	-2.32814	-1.41639	1.26e-17	7.06e-17
CNGA3	-2.61777	-0.0752017	1.34e-17	7.52e-17
TM4SF19	2.84276	-1.49494	1.44e-17	8.05e-17
TAS2R38	2.74186	-1.34595	1.6e-17	8.96e-17
RSPO1	-2.00969	-1.36626	1.64e-17	9.14e-17
KRT1	-2.30343	-1.35532	1.65e-17	9.2e-17
SIX4	2.82215	0.941092	1.81e-17	1.01e-16
ADRB3	-2.41097	-2.45168	2.07e-17	1.15e-16
MSLNL	5.56425	-1.24453	2.29e-17	1.27e-16
PAEP	9.19608	3.04867	2.36e-17	1.31e-16
FCGBP	-2.29948	10.1037	2.44e-17	1.35e-16
SH2D5	3.17944	-0.939015	2.5e-17	1.38e-16
WDR97	2.45638	1.17924	2.63e-17	1.45e-16
RALYL	-2.78964	-3.0441	2.74e-17	1.5e-16
CSF2	3.37936	-0.418002	2.99e-17	1.64e-16
PPBP	9.08453	6.07344	3.16e-17	1.73e-16
KRTAP5-1	2.04483	0.142742	3.26e-17	1.78e-16
HABP2	6.18171	1.13623	3.36e-17	1.83e-16
AICDA	-2.7125	-2.27485	4.15e-17	2.25e-16
KIF1A	-2.47469	1.30168	4.53e-17	2.45e-16
PLPP4	2.93789	1.48471	4.64e-17	2.51e-16
EREG	3.42125	5.89796	4.74e-17	2.56e-16
SYT9	-2.32003	-2.99746	5.52e-17	2.96e-16
TPSG1	-2.07843	3.00645	5.64e-17	3.03e-16
ABCG5	-2.02124	0.271352	5.66e-17	3.04e-16
GSDMA	2.46783	2.01713	5.83e-17	3.13e-16
ONECUT2	2.74724	2.62141	6.18e-17	3.31e-16
LY6G6D	5.54915	3.2603	6.91e-17	3.69e-16
PRSS33	4.49536	2.98543	6.95e-17	3.71e-16
KREMEN2	2.19709	1.34712	7.18e-17	3.83e-16
DOK7	2.26789	1.8335	7.96e-17	4.23e-16
SLC18A3	-2.80436	-2.50685	8.67e-17	4.59e-16
KRT16	5.91013	2.16382	1.07e-16	5.64e-16
TRIM72	5.55424	2.48402	1.08e-16	5.71e-16
ERICH2	2.56394	0.00733922	1.1e-16	5.81e-16
FAM131C	2.59476	-0.730124	1.17e-16	6.14e-16
TMPRSS5	3.2663	1.07027	1.18e-16	6.22e-16
NXPH1	4.51232	-2.50059	1.28e-16	6.72e-16
CITED1	2.85472	0.853514	1.41e-16	7.35e-16
RDH16	2.28071	-0.25566	1.44e-16	7.55e-16
UNC93A	3.92277	2.23065	1.49e-16	7.77e-16
REP15	-2.12358	1.05903	1.81e-16	9.39e-16
DMRTA2	5.33814	0.927726	1.95e-16	1.01e-15
TNNT1	4.37359	2.26542	2.13e-16	1.1e-15
FOLR1	4.48328	2.72584	2.2e-16	1.13e-15
CHST4	5.22308	1.97444	3.29e-16	1.68e-15
FER1L6	-2.26072	2.95882	3.51e-16	1.79e-15
ZNF676	-2.14484	-2.79971	3.67e-16	1.87e-15
TREM1	2.82211	2.32795	4.1e-16	2.08e-15
ZNF469	2.00012	3.28193	4.14e-16	2.1e-15
GJB5	4.53913	2.26116	4.26e-16	2.16e-15
CYP4X1	2.98255	3.51468	4.52e-16	2.29e-15
NPY1R	-2.03635	1.15706	5.65e-16	2.85e-15
LCN12	2.1532	2.17409	5.93e-16	2.98e-15
EDAR	2.88709	4.20218	6.02e-16	3.02e-15
SPRR2D	7.69982	0.809593	6.22e-16	3.12e-15
C14orf180	-2.97581	-2.15528	6.24e-16	3.13e-15
ZDHHC22	-2.72476	-2.71412	7.46e-16	3.73e-15
COL12A1	2.00806	7.95375	8.03e-16	4e-15
SLC26A9	6.33857	1.13077	8.14e-16	4.05e-15
HOGA1	2.79647	-0.358399	8.25e-16	4.11e-15
TMEM40	3.99136	-1.48078	8.39e-16	4.17e-15
SSTR5	4.17251	0.898759	8.76e-16	4.35e-15
CXCL17	5.30721	0.821865	9.49e-16	4.71e-15
TH	3.26091	0.438134	9.8e-16	4.85e-15
WFDC10A	3.53272	-2.61324	1.07e-15	5.29e-15
TBPL2	-2.00203	-3.3657	1.13e-15	5.56e-15
ALOXE3	3.20818	-1.39604	1.14e-15	5.62e-15
SRMS	2.14406	2.79687	1.21e-15	5.95e-15
IGFL2	3.76246	1.76526	1.21e-15	5.97e-15
CHST9	-2.72938	-2.26054	1.25e-15	6.13e-15
SFRP4	3.21368	5.44719	1.26e-15	6.2e-15
WISP3	4.20364	1.37334	1.33e-15	6.54e-15
MUC6	7.18643	4.86679	1.37e-15	6.7e-15
GOLGA6L2	5.4929	-2.3314	1.48e-15	7.22e-15
TSPEAR	3.18058	0.895836	1.56e-15	7.61e-15
MMP8	5.79816	0.513224	1.57e-15	7.67e-15
NMU	2.91396	2.44496	1.6e-15	7.79e-15
GCG	-3.31518	3.21711	1.72e-15	8.37e-15
CAMKV	4.31053	0.494582	1.82e-15	8.85e-15
NEB	2.86505	2.08117	1.84e-15	8.93e-15
MRGPRE	-2.24701	-3.39648	1.95e-15	9.44e-15
OBP2B	6.77563	-0.379772	1.99e-15	9.65e-15
MYT1L	-2.55465	-2.81711	2.05e-15	9.93e-15
KISS1	2.75055	-0.018676	2.08e-15	1.01e-14
GAS2	2.05409	1.35228	2.1e-15	1.01e-14
TNNT3	-2.11079	-2.30632	2.12e-15	1.03e-14
PRKCG	3.61636	1.30443	2.19e-15	1.06e-14
WDR72	3.08897	4.19488	2.29e-15	1.1e-14
DSC3	4.20819	3.80631	2.92e-15	1.39e-14
C9orf50	2.3695	-1.34836	2.97e-15	1.42e-14
KRT83	4.2317	-1.36211	3.18e-15	1.52e-14
COL9A3	3.1763	4.90004	3.36e-15	1.6e-14
MYADML2	2.96813	1.34368	3.37e-15	1.6e-14
DMRT3	4.14014	-1.69516	3.83e-15	1.81e-14
HIST1H1E	6.65311	3.2282	3.85e-15	1.82e-14
PRSS56	9.43605	2.29997	3.93e-15	1.86e-14
SULT2A1	-2.83732	0.48648	5.01e-15	2.35e-14
CSTL1	3.16199	-1.9978	5.33e-15	2.5e-14
FDCSP	-2.47585	1.32177	5.39e-15	2.53e-14
ONECUT3	6.84007	2.1279	5.67e-15	2.66e-14
CCR8	2.1582	-0.994243	5.83e-15	2.73e-14
SPRR1A	7.92393	0.661487	6.19e-15	2.89e-14
MAGEB17	5.5384	1.58668	6.68e-15	3.12e-14
CLPSL2	3.79557	-3.23414	6.74e-15	3.15e-14
CYP2W1	4.19992	5.85166	7.73e-15	3.6e-14
PALM3	2.87333	1.98607	9.32e-15	4.32e-14
GJA3	3.42904	-0.2399	9.45e-15	4.37e-14
DSG1	2.49736	-0.61799	1.01e-14	4.64e-14
GATA5	-2.60816	-1.09613	1.06e-14	4.86e-14
LRRC43	2.04695	-0.30824	1.18e-14	5.4e-14
SLC14A2	-2.47718	-0.247983	1.24e-14	5.68e-14
HIST1H1B	7.13619	3.19323	1.26e-14	5.76e-14
ARHGAP40	4.7982	-1.04892	1.27e-14	5.78e-14
ADH1A	-2.18505	-2.98979	1.29e-14	5.89e-14
CARTPT	-2.57269	-1.11797	1.42e-14	6.47e-14
NDUFA4L2	2.41614	4.51158	1.47e-14	6.67e-14
UGT1A9	-2.03494	-3.10065	1.59e-14	7.23e-14
CA10	-2.17442	-2.1122	1.6e-14	7.24e-14
CILP2	2.79513	1.00831	1.63e-14	7.4e-14
PRSS41	3.98201	-1.178	1.7e-14	7.68e-14
DNAH14	2.02608	2.94624	1.77e-14	8e-14
EVX1	3.40115	2.78571	1.8e-14	8.11e-14
LAIR2	2.71484	-0.380595	1.8e-14	8.12e-14
RAD51AP2	2.18522	-1.31871	1.84e-14	8.31e-14
ABCG8	-2.14489	-0.200325	1.89e-14	8.53e-14
PADI3	5.2119	2.16687	1.9e-14	8.53e-14
BAAT	4.70805	0.387036	2.13e-14	9.55e-14
MIOX	3.56107	-0.921948	2.34e-14	1.05e-13
SLC13A2	-2.18137	3.6148	2.59e-14	1.16e-13
MYBPHL	5.38782	-0.594978	2.61e-14	1.17e-13
NPC1L1	3.94216	2.65426	2.71e-14	1.2e-13
DUSP15	2.36473	1.56327	2.76e-14	1.23e-13
IGF2BP3	4.20826	2.2971	2.89e-14	1.28e-13
ATP5EP2	2.04239	0.64923	2.95e-14	1.31e-13
FGF20	5.69995	-0.183179	3.05e-14	1.35e-13
CD300LG	-2.57424	-1.40288	3.23e-14	1.42e-13
KLK11	3.33537	3.64764	3.29e-14	1.45e-13
SP8	4.59087	0.276218	3.38e-14	1.49e-13
CLDN18	7.3168	4.86405	3.42e-14	1.51e-13
SORCS3	-2.43667	-2.74589	3.52e-14	1.55e-13
AQP5	5.97222	2.84619	3.54e-14	1.55e-13
SLC28A3	2.57918	3.17877	3.58e-14	1.57e-13
SERPIND1	3.68163	0.677687	3.62e-14	1.59e-13
THBS2	2.40187	7.21319	3.96e-14	1.74e-13
IRX3	3.3973	0.542129	4.27e-14	1.87e-13
PLCXD3	-2.39082	-0.819133	4.29e-14	1.87e-13
CADPS	2.21872	4.48326	4.3e-14	1.88e-13
TNNT2	2.43898	0.325405	5.11e-14	2.22e-13
DSG3	4.1183	3.70328	5.11e-14	2.22e-13
HRK	-2.23546	-1.565	5.35e-14	2.31e-13
MAT1A	3.13609	2.04697	5.38e-14	2.33e-13
GRK1	3.46551	-0.907522	5.45e-14	2.36e-13
SEC14L4	4.41863	-0.54665	6.17e-14	2.66e-13
SPRR2A	7.30787	0.792216	6.34e-14	2.73e-13
NT5DC4	2.28364	-0.794267	6.6e-14	2.84e-13
BRSK2	2.71795	2.68234	7.2e-14	3.09e-13
ZNF728	-2.1869	-3.40789	7.45e-14	3.2e-13
AKAP4	4.80103	-2.11559	8.08e-14	3.46e-13
NTNG1	-2.34934	-0.962884	8.25e-14	3.53e-13
KCNJ13	-3.24919	0.31067	8.58e-14	3.67e-13
NAT16	3.19489	-1.84254	9.41e-14	4.01e-13
CELA3B	-2.34105	-2.12721	9.8e-14	4.17e-13
HCAR1	3.61341	1.23489	1.1e-13	4.64e-13
VGLL1	5.86816	-1.28857	1.15e-13	4.84e-13
CCDC187	2.78178	-0.0793242	1.15e-13	4.84e-13
DCSTAMP	3.07151	-0.913935	1.19e-13	5.03e-13
WNT8B	2.32694	-1.73036	1.3e-13	5.47e-13
ABCA12	4.10639	1.33024	1.49e-13	6.25e-13
HIST1H3J	5.47823	0.468923	1.55e-13	6.48e-13
C1orf105	2.92033	-0.976143	1.76e-13	7.34e-13
SERPINE1	2.09414	5.63525	1.88e-13	7.82e-13
NEUROG2	5.39279	-1.05319	1.93e-13	8e-13
C2CD4B	2.5334	3.11525	2.02e-13	8.39e-13
HIST1H4C	6.95944	2.2559	2.04e-13	8.46e-13
HIST1H2AH	6.13064	0.660364	2.17e-13	8.99e-13
PRR9	7.92134	0.261998	2.22e-13	9.17e-13
SPRR1B	7.48724	1.05448	2.24e-13	9.24e-13
F2	3.43546	-0.569626	2.31e-13	9.52e-13
TRIM71	5.52859	-0.222192	2.36e-13	9.72e-13
HIST1H4E	5.17159	2.35551	2.4e-13	9.89e-13
SLC38A5	2.019	6.44439	2.43e-13	1e-12
KCNH4	2.00001	-0.25179	2.78e-13	1.14e-12
LRRC9	2.62796	-1.75993	2.89e-13	1.18e-12
WFDC10B	2.33603	-1.43842	3.01e-13	1.23e-12
TMEM196	-2.40396	-3.57691	3.09e-13	1.26e-12
RASSF10	2.38157	2.8964	3.12e-13	1.27e-12
NPSR1	5.67346	2.6392	3.17e-13	1.29e-12
GIF	3.68204	1.26269	3.2e-13	1.3e-12
SERPINB7	5.43163	0.577524	3.28e-13	1.33e-12
IZUMO1	2.34243	-1.96614	3.41e-13	1.38e-12
VENTX	3.48091	2.10282	3.52e-13	1.43e-12
BEST3	4.31027	-0.421973	3.52e-13	1.43e-12
AFP	4.70834	-0.534436	3.61e-13	1.46e-12
NACA2	2.60934	0.0240735	3.71e-13	1.5e-12
MCEMP1	2.9113	0.673672	3.73e-13	1.51e-12
FXYD4	2.92789	-0.578251	3.88e-13	1.57e-12
SLCO1B1	4.75523	-2.09596	3.89e-13	1.57e-12
IL1RN	2.12693	4.50699	3.91e-13	1.58e-12
MSLN	2.97846	6.39976	4.19e-13	1.69e-12
MPPED1	-2.12867	-3.47898	4.25e-13	1.71e-12
ERP27	2.59951	2.82613	4.55e-13	1.83e-12
PLA2G3	4.43356	1.46326	4.77e-13	1.91e-12
KCNJ16	-2.01667	-1.789	5.24e-13	2.1e-12
AL662899.1	3.21991	-2.85948	5.28e-13	2.11e-12
AC011604.2	4.26333	-3.05466	5.35e-13	2.14e-12
ERVMER34-1	2.65081	1.83213	6.3e-13	2.51e-12
HIST1H4B	6.72599	0.964953	6.38e-13	2.54e-12
GNG13	-2.08718	-0.87352	6.41e-13	2.55e-12
HIST1H4D	6.24107	1.83569	6.48e-13	2.58e-12
NRAP	-2.0222	-0.899467	6.77e-13	2.69e-12
KCNK9	2.92651	-0.104575	6.84e-13	2.72e-12
MMP20	3.70451	-1.84617	6.87e-13	2.73e-12
IFITM5	3.95678	-2.64855	7.35e-13	2.91e-12
CLDN9	2.44369	1.06002	7.46e-13	2.96e-12
APCDD1	2.48379	6.61277	7.47e-13	2.96e-12
NPW	2.7281	0.818683	7.71e-13	3.05e-12
CKMT2	3.46367	4.05147	1.06e-12	4.15e-12
TTC16	2.11887	-0.981911	1.06e-12	4.15e-12
IL17C	3.397	-0.839747	1.08e-12	4.22e-12
PRSS1	4.75814	1.04285	1.13e-12	4.42e-12
SVOPL	-2.25775	-0.562251	1.27e-12	4.94e-12
HIST3H2BB	2.49249	-0.223536	1.29e-12	5.03e-12
KRT6A	5.64488	3.548	1.41e-12	5.49e-12
IGF2	5.26486	10.313	1.6e-12	6.18e-12
HIST1H3B	6.20097	2.1418	1.6e-12	6.2e-12
KLHL34	-2.08119	-0.362234	1.71e-12	6.59e-12
ITGBL1	2.50727	2.34355	1.78e-12	6.85e-12
F7	3.63564	1.27586	1.8e-12	6.93e-12
USP26	4.16677	-2.91808	1.85e-12	7.11e-12
IGF2BP1	4.71851	2.26992	1.85e-12	7.13e-12
GZMB	2.13594	3.83	1.86e-12	7.17e-12
VGF	2.95003	2.64465	1.91e-12	7.33e-12
CXCL6	2.44639	1.70797	2.08e-12	7.96e-12
HCRT	2.8282	-2.55226	2.1e-12	8.04e-12
FCRL1	-2.06729	-0.522146	2.15e-12	8.21e-12
RNF224	2.10318	-0.918301	2.15e-12	8.24e-12
LY6D	5.14669	0.946493	2.19e-12	8.36e-12
CALCA	5.54487	1.85242	2.2e-12	8.41e-12
KRT6C	5.54597	-1.21062	2.36e-12	8.99e-12
RHBG	2.92199	-2.31728	2.43e-12	9.25e-12
UPK2	4.23853	-0.749961	2.44e-12	9.28e-12
MAGEA3	10.022	2.33105	2.49e-12	9.46e-12
C20orf204	2.44397	0.70824	2.81e-12	1.06e-11
BIRC7	2.46652	-0.0306539	2.89e-12	1.09e-11
HEPACAM	-2.24216	-3.03601	2.98e-12	1.13e-11
SLCO1B7	4.50453	-2.91231	3.53e-12	1.33e-11
KRT31	6.34787	-1.69638	3.55e-12	1.34e-11
SCG3	-2.11274	0.0921364	3.67e-12	1.38e-11
KISS1R	3.20145	-1.08567	3.69e-12	1.38e-11
ORM2	2.98921	-1.30269	3.7e-12	1.39e-11
PSORS1C2	2.85421	-0.944787	3.83e-12	1.44e-11
PADI1	2.49921	1.60829	4.17e-12	1.56e-11
METTL11B	2.8916	-3.12905	4.21e-12	1.57e-11
OMD	-2.09265	0.559525	4.48e-12	1.67e-11
OSM	2.27163	2.76975	5.08e-12	1.89e-11
KIAA2012	2.03922	-1.40141	5.11e-12	1.9e-11
TNFRSF11B	2.02863	4.23142	5.51e-12	2.04e-11
INHBB	2.20645	3.22241	6.03e-12	2.22e-11
LYPD3	2.0538	2.281	6.29e-12	2.32e-11
MMP10	2.41019	2.03036	6.48e-12	2.39e-11
EVX2	-2.12507	-2.61696	6.57e-12	2.42e-11
SOX1	4.67265	1.06583	6.75e-12	2.48e-11
HIST1H2BO	5.12387	0.956257	6.79e-12	2.5e-11
MUC16	4.63402	1.38513	7.16e-12	2.63e-11
HIST2H2BF	3.38592	1.41498	7.24e-12	2.65e-11
CXCL11	2.55788	4.18643	7.36e-12	2.7e-11
HES7	3.25855	-1.95414	7.93e-12	2.9e-11
RHCG	2.58009	1.25968	8.04e-12	2.93e-11
DIRC1	3.2516	-2.87139	8.14e-12	2.97e-11
KRTAP3-1	4.89751	-2.41585	8.3e-12	3.03e-11
CCL26	2.39252	0.13137	8.36e-12	3.05e-11
GABRP	3.51269	3.36446	8.36e-12	3.05e-11
RASL10B	2.26784	1.6418	8.39e-12	3.06e-11
HIST1H2AB	6.15351	0.069372	8.5e-12	3.09e-11
RP1L1	2.42383	-1.26106	8.51e-12	3.1e-11
PRSS51	3.0024	-0.0809228	8.78e-12	3.19e-11
ATAD3C	2.00466	1.79284	9.07e-12	3.3e-11
BEAN1	2.2207	0.52454	9.66e-12	3.51e-11
RNF182	3.48899	0.665831	1.03e-11	3.73e-11
DLX6	3.81799	-0.0165663	1.06e-11	3.83e-11
PGLYRP3	4.48268	-2.25019	1.07e-11	3.86e-11
HIST1H2AL	5.21845	-0.0444192	1.09e-11	3.93e-11
SYT8	2.12684	1.21981	1.18e-11	4.25e-11
CLCA1	-2.42081	8.8378	1.2e-11	4.33e-11
MPP4	2.10189	-2.66923	1.21e-11	4.34e-11
SERPINB2	4.44827	0.592858	1.23e-11	4.43e-11
CST6	3.32352	0.0320025	1.24e-11	4.46e-11
TEX19	3.18953	-1.94754	1.3e-11	4.67e-11
DNAH12	2.07492	-1.26033	1.34e-11	4.82e-11
CALB1	5.42005	3.76865	1.41e-11	5.05e-11
OFCC1	3.91395	-2.2419	1.49e-11	5.33e-11
MYCN	2.44262	2.11425	1.59e-11	5.66e-11
BHLHA9	4.47267	-2.22617	1.6e-11	5.71e-11
KIAA1549L	2.65312	2.37078	1.73e-11	6.15e-11
PRDM13	3.99059	-0.964812	1.73e-11	6.17e-11
UPK1A	3.88997	-0.984841	1.78e-11	6.33e-11
ISM2	3.51913	1.36175	1.79e-11	6.34e-11
ACTL6B	-2.12869	-3.03826	1.83e-11	6.5e-11
CREG2	2.59603	0.499515	2.02e-11	7.17e-11
RIPPLY1	2.38901	-2.11899	2.09e-11	7.38e-11
POU3F2	3.04435	-2.10386	2.16e-11	7.63e-11
HIST1H2BI	7.02248	0.804992	2.27e-11	8e-11
WNT11	2.61691	4.5832	2.38e-11	8.39e-11
SPAG17	2.88653	-1.37595	2.54e-11	8.93e-11
SLCO1A2	4.10336	-1.02819	2.56e-11	8.99e-11
ATP2B3	-2.26269	-2.33313	2.65e-11	9.31e-11
ATP6V0A4	3.78805	-1.49166	2.69e-11	9.41e-11
HIST1H3I	5.89255	-0.020907	2.82e-11	9.87e-11
ROBO2	2.09195	2.63123	2.95e-11	1.03e-10
TCP11	4.85591	0.566577	3.2e-11	1.11e-10
MAGEA6	9.4538	2.12581	3.31e-11	1.15e-10
FAM19A4	-2.27409	-3.08106	3.34e-11	1.16e-10
SMPX	-2.21674	0.0869395	3.49e-11	1.21e-10
CST5	3.49374	-2.87995	3.51e-11	1.22e-10
PTF1A	6.01218	-1.26804	3.56e-11	1.23e-10
AMER2	-2.24683	-3.23245	3.6e-11	1.25e-10
HIST1H2AJ	5.4274	0.765873	3.74e-11	1.3e-10
KLK12	3.24552	2.67622	4.15e-11	1.43e-10
ORM1	6.42069	1.99159	4.28e-11	1.47e-10
AC010422.3	2.65007	1.75787	4.52e-11	1.56e-10
AQP6	2.0441	-0.750419	4.7e-11	1.61e-10
AQP2	3.44158	-2.76808	4.89e-11	1.67e-10
KCTD8	-2.28753	-2.822	4.94e-11	1.69e-10
DLL3	2.58007	-0.664671	5.22e-11	1.79e-10
ITLN1	-2.20637	6.66131	5.51e-11	1.88e-10
FADS6	-2.2375	0.286916	5.73e-11	1.95e-10
KRTAP3-2	3.50167	-3.28129	5.83e-11	1.98e-10
KLRG2	3.77997	0.211927	5.97e-11	2.03e-10
NUPR2	-2.26299	-2.84618	6.06e-11	2.06e-10
ADGRG4	-2.71396	-3.19459	6.08e-11	2.06e-10
GAST	3.66222	-2.76669	6.2e-11	2.1e-10
CACNG4	3.50995	2.21136	7.37e-11	2.49e-10
DRD5	-2.49672	-1.10255	7.5e-11	2.53e-10
UGT1A3	-2.13226	-3.14511	7.6e-11	2.56e-10
IVL	6.68228	-1.38554	7.64e-11	2.57e-10
LHX5	3.64666	-2.28063	7.71e-11	2.59e-10
KCNJ15	2.29105	1.11534	7.94e-11	2.67e-10
DPCR1	4.57086	-0.481638	8.06e-11	2.71e-10
MAGEA12	8.62218	1.15935	8.34e-11	2.8e-10
FGF8	2.88865	-2.56472	8.44e-11	2.83e-10
ZNF750	2.9984	-0.109641	8.58e-11	2.87e-10
DKK1	3.62927	1.37716	8.81e-11	2.95e-10
LGR6	2.08488	4.8264	9.12e-11	3.04e-10
NKX2-1	7.47759	1.11827	9.34e-11	3.12e-10
IRX6	-2.16398	-3.16531	9.86e-11	3.28e-10
MYH4	2.84211	-1.26034	1.04e-10	3.45e-10
GPR143	2.14132	3.05021	1.13e-10	3.74e-10
MUC5AC	4.25437	5.95837	1.17e-10	3.89e-10
DRD2	3.20536	2.16397	1.2e-10	3.98e-10
LCN2	2.25937	9.44048	1.21e-10	4.01e-10
HIST2H2AB	5.82693	-0.137347	1.27e-10	4.2e-10
IGFL3	3.60881	-1.48118	1.37e-10	4.51e-10
ATP6V1B1	2.12303	-0.724953	1.37e-10	4.52e-10
GNGT1	3.16494	-1.15224	1.38e-10	4.55e-10
HIST1H2BL	3.90848	0.676091	1.44e-10	4.74e-10
ARSH	2.02863	-1.75952	1.46e-10	4.79e-10
KRT37	4.50258	-2.88181	1.48e-10	4.85e-10
SLC6A14	2.56836	4.14913	1.54e-10	5.06e-10
GNG4	2.61463	5.39831	1.59e-10	5.22e-10
S100A7	5.57226	-0.671326	1.66e-10	5.42e-10
MYBPC3	2.28769	-0.825613	1.74e-10	5.68e-10
POU4F1	2.70283	-0.882381	1.77e-10	5.78e-10
IFNE	3.78209	-2.41568	1.79e-10	5.85e-10
DMRT1	5.21062	-1.76297	1.82e-10	5.94e-10
PLAC1	2.49682	-0.804224	1.89e-10	6.14e-10
C9orf57	2.90619	-3.15374	1.94e-10	6.31e-10
AQP9	2.4708	2.79301	1.97e-10	6.41e-10
LMX1A	-2.19106	-1.9131	2.06e-10	6.69e-10
LRP2	3.4097	-1.91753	2.11e-10	6.86e-10
KRT32	4.60026	-2.71264	2.3e-10	7.44e-10
SPRR3	6.72379	1.26759	2.34e-10	7.56e-10
FGF3	5.39801	-1.78348	2.38e-10	7.69e-10
B4GALNT4	2.59692	3.43153	2.45e-10	7.9e-10
CLLU1	3.69858	-2.35601	2.49e-10	8.03e-10
SIGLEC15	2.20913	1.41228	2.62e-10	8.42e-10
SAA4	3.35851	-2.38007	2.86e-10	9.18e-10
DMP1	3.73864	-3.2076	2.87e-10	9.22e-10
TBX20	3.27678	-0.969471	2.92e-10	9.37e-10
FOXD1	3.03768	1.43856	3e-10	9.62e-10
AC004805.1	2.25407	-2.79093	3.14e-10	1e-09
CGB5	4.78426	-2.77535	3.28e-10	1.05e-09
SIX2	3.06233	0.777986	3.34e-10	1.07e-09
SPRR2E	7.60282	0.0466107	3.61e-10	1.15e-09
PALM2	2.37383	-1.17686	3.83e-10	1.22e-09
MUC21	4.53104	-2.80092	3.87e-10	1.23e-09
PNMA5	7.25384	2.36873	3.88e-10	1.23e-09
ARMC3	3.31479	-1.44594	4e-10	1.27e-09
IGFBP1	3.61484	-0.291046	4.32e-10	1.37e-09
FOXI3	5.0423	-2.08832	4.59e-10	1.45e-09
GRM8	2.24071	4.02731	5.36e-10	1.69e-09
GRPR	2.8505	-0.0339523	5.89e-10	1.85e-09
HIST1H1D	4.70962	1.95543	6.26e-10	1.96e-09
EYA1	3.17403	1.38035	6.41e-10	2.01e-09
GSC	2.11894	-2.39614	6.74e-10	2.11e-09
CYP4F8	3.04478	-0.765802	6.84e-10	2.14e-09
AC005324.3	2.5291	-2.27082	6.88e-10	2.15e-09
CLLU1OS	2.9213	-1.63359	6.91e-10	2.16e-09
LYZL4	2.91377	-3.44288	7.15e-10	2.23e-09
LCE1E	4.27319	-3.2023	7.47e-10	2.32e-09
CD200R1L	4.85693	-1.76307	7.56e-10	2.35e-09
HEPHL1	2.78669	1.09158	7.65e-10	2.38e-09
TBX4	3.70967	0.0872323	7.8e-10	2.42e-09
GPR12	-2.21908	-3.36011	7.84e-10	2.43e-09
MAGEA11	6.15043	0.77822	8.1e-10	2.51e-09
F5	2.47473	3.22114	8.54e-10	2.64e-09
MTRNR2L1	-2.37317	3.33257	8.71e-10	2.69e-09
BHMG1	2.83376	-2.9937	8.87e-10	2.74e-09
VTCN1	3.42055	-0.814711	8.89e-10	2.74e-09
HSPB3	-2.16378	-0.504904	9.87e-10	3.03e-09
HIST1H2BE	4.02213	-0.0603168	1.01e-09	3.09e-09
SLC6A20	2.12267	4.95429	1.01e-09	3.1e-09
CYP19A1	2.12174	-0.304169	1.02e-09	3.13e-09
IZUMO2	3.28117	-1.02829	1.04e-09	3.2e-09
CSAG1	6.67304	0.264208	1.05e-09	3.21e-09
FBXO2	2.32367	3.27198	1.08e-09	3.29e-09
CHRNA6	2.5934	-2.41104	1.08e-09	3.3e-09
MYO18B	2.61101	-1.11574	1.1e-09	3.37e-09
EGR4	2.32723	-1.25411	1.15e-09	3.51e-09
EPHA8	4.69132	-1.36181	1.17e-09	3.57e-09
KRT35	4.33146	-2.83924	1.18e-09	3.59e-09
A2ML1	4.34422	0.399704	1.26e-09	3.81e-09
HIST1H4L	7.06401	-0.161045	1.32e-09	4e-09
NPIPA3	2.10772	-1.53916	1.33e-09	4.02e-09
AC006269.1	2.70506	-3.53058	1.38e-09	4.19e-09
ANKRD18B	3.27411	-1.45293	1.39e-09	4.21e-09
SAA2	2.6671	2.02714	1.43e-09	4.33e-09
IL36RN	3.54443	-2.02901	1.68e-09	5.04e-09
XIRP1	2.13076	-0.359804	1.72e-09	5.17e-09
RNF225	3.14836	-3.39808	1.87e-09	5.61e-09
HIST1H2BF	3.85339	0.878492	1.91e-09	5.72e-09
PRSS2	5.04952	5.85473	1.97e-09	5.88e-09
UGT1A4	-2.4654	-3.59271	2.11e-09	6.31e-09
HTR3C	-2.30247	-1.92946	2.15e-09	6.4e-09
HIST2H2AC	2.75994	1.51111	2.29e-09	6.82e-09
CALML3	2.87441	0.218111	2.47e-09	7.34e-09
HIST1H2AM	3.47285	0.579855	2.58e-09	7.63e-09
GRP	2.17039	0.564405	2.67e-09	7.91e-09
ANKRD36C	2.25343	2.12867	2.84e-09	8.38e-09
ERVV-2	4.06321	-2.99991	2.92e-09	8.61e-09
GLYATL3	-2.24109	-3.59226	2.99e-09	8.8e-09
POU5F2	5.40638	-0.473126	3.09e-09	9.08e-09
FZD10	3.06499	2.86044	3.14e-09	9.24e-09
SERPINB4	5.80806	-1.37878	3.25e-09	9.53e-09
MEGF11	2.37662	0.615594	3.3e-09	9.69e-09
SBSN	3.06306	-1.32221	3.32e-09	9.73e-09
SPZ1	3.07598	-3.42684	3.35e-09	9.83e-09
FGF21	3.09957	-3.54782	3.36e-09	9.84e-09
ANKRD33	2.73231	-2.54842	3.82e-09	1.12e-08
ANXA10	4.74231	1.54955	3.93e-09	1.15e-08
FGB	3.59438	0.269524	4.02e-09	1.17e-08
HBE1	6.32441	-0.171542	4.07e-09	1.19e-08
LGALS7B	2.52981	-2.24894	4.15e-09	1.21e-08
SIX3	3.78311	-1.35464	4.51e-09	1.31e-08
VNN3	2.15726	-0.865303	4.6e-09	1.34e-08
C10orf113	4.91052	-2.23822	4.67e-09	1.35e-08
AC004233.2	3.63164	0.605929	4.79e-09	1.39e-08
AHSG	4.22648	0.0904784	4.82e-09	1.4e-08
HIST1H4A	4.6022	-0.931045	5.05e-09	1.46e-08
KCNV2	2.29245	-2.35831	5.13e-09	1.48e-08
SEMG2	5.28246	-1.81303	5.23e-09	1.51e-08
AQP4	-2.00559	-2.9166	5.36e-09	1.55e-08
CHRNG	2.3444	-1.9233	5.4e-09	1.56e-08
PIK3C2G	-2.18368	-2.84978	5.42e-09	1.56e-08
UNC5A	2.32574	0.16989	5.83e-09	1.68e-08
CHRND	4.63441	-2.13847	6.22e-09	1.78e-08
CA5A	2.03162	-2.72659	6.3e-09	1.81e-08
SOHLH1	5.79873	-1.07355	6.4e-09	1.83e-08
KRT4	3.60503	-1.15309	6.57e-09	1.88e-08
UROC1	2.63337	-2.84595	6.62e-09	1.9e-08
HBQ1	3.14523	-1.94503	7.43e-09	2.12e-08
NAT8	-2.07179	-0.596846	7.44e-09	2.12e-08
TFF2	3.53433	4.17814	7.71e-09	2.19e-08
SPACA3	2.54803	0.061047	8.01e-09	2.28e-08
FGF19	3.54559	1.80087	8.46e-09	2.4e-08
ZNF460	2.21537	2.09321	8.63e-09	2.45e-08
RGS20	2.14037	-1.70996	8.9e-09	2.52e-08
C19orf81	2.84928	-2.3677	8.99e-09	2.54e-08
SP9	5.06545	-1.68946	9.18e-09	2.6e-08
MS4A15	2.53949	-0.489624	9.28e-09	2.62e-08
SLC38A3	2.68711	0.298705	9.39e-09	2.65e-08
INHA	2.92956	-1.51373	9.45e-09	2.67e-08
TMPRSS15	-2.51484	-2.56274	9.48e-09	2.68e-08
KLK5	4.76569	-1.49502	9.55e-09	2.69e-08
ZNF556	3.24357	-0.248065	9.58e-09	2.7e-08
KAAG1	2.3709	-2.88148	9.67e-09	2.73e-08
GPR87	4.64452	-2.0221	9.82e-09	2.77e-08
FOXL2NB	3.73679	-2.66298	1e-08	2.81e-08
RGR	3.54929	-1.14928	1.02e-08	2.86e-08
NPTX2	2.66536	4.72316	1.08e-08	3.04e-08
GSX1	3.46628	-3.49705	1.1e-08	3.09e-08
TRIM7	2.1375	3.10297	1.13e-08	3.17e-08
AGTR2	-2.21962	-3.6285	1.16e-08	3.24e-08
DPEP1	2.25173	8.06941	1.18e-08	3.3e-08
SERTM1	-2.15942	-3.29176	1.21e-08	3.39e-08
MAK	2.00078	0.441135	1.22e-08	3.41e-08
TTC29	5.70674	-0.140164	1.22e-08	3.42e-08
MAGEC1	5.52292	-2.35747	1.25e-08	3.49e-08
HOXC12	5.43007	-1.09856	1.25e-08	3.49e-08
NODAL	2.06549	-0.970098	1.3e-08	3.62e-08
MAGEA10	5.78312	-1.52346	1.41e-08	3.93e-08
SHOX2	2.07627	-0.482737	1.44e-08	3.99e-08
NMUR2	4.13295	0.0332202	1.51e-08	4.19e-08
SERPINA7	3.32162	0.0323303	1.51e-08	4.19e-08
MT4	6.1921	-1.0398	1.55e-08	4.29e-08
CLDN6	3.29868	-0.950383	1.58e-08	4.37e-08
FEZF2	3.73555	-3.1366	1.65e-08	4.56e-08
KRT38	4.03242	-3.08681	1.72e-08	4.73e-08
LHX1	3.6042	-2.90294	1.9e-08	5.23e-08
SERPINB3	5.79005	-0.813458	1.95e-08	5.34e-08
KRT34	3.47403	-3.29171	1.96e-08	5.37e-08
HS3ST4	4.43469	-0.458507	1.98e-08	5.41e-08
COLEC10	2.58975	-0.794609	1.99e-08	5.44e-08
RNF113B	4.26572	-2.81958	2.04e-08	5.59e-08
HIST1H2AD	3.08414	1.50745	2.06e-08	5.64e-08
MUC15	4.87338	-1.73637	2.08e-08	5.68e-08
GATA4	4.69645	1.16206	2.4e-08	6.53e-08
CYP26A1	2.35462	-1.24866	2.43e-08	6.63e-08
SAGE1	4.84236	-2.63743	2.58e-08	6.99e-08
PRSS48	4.74754	-0.378123	2.58e-08	6.99e-08
HIST2H3D	2.93875	-1.66187	2.58e-08	6.99e-08
FAM9A	3.87335	-3.28901	2.59e-08	7.02e-08
FUT9	-2.4423	-2.9293	2.63e-08	7.13e-08
DLX3	3.03007	0.961828	2.69e-08	7.29e-08
SYNGR4	2.59659	-0.0727755	2.72e-08	7.35e-08
SMC1B	2.17051	-0.696285	2.88e-08	7.78e-08
SBSPON	2.02356	4.02012	2.89e-08	7.79e-08
MAGEA1	7.45502	-0.0960241	2.9e-08	7.83e-08
GBP7	2.2482	-2.17279	2.9e-08	7.84e-08
ACTL8	2.6803	1.60782	2.96e-08	7.98e-08
CPN1	3.24653	-0.249233	2.96e-08	7.98e-08
KRT5	4.33795	3.57176	3.03e-08	8.15e-08
C20orf85	4.0123	-2.60709	3.37e-08	9.03e-08
ACTBL2	3.14917	-2.58407	3.46e-08	9.27e-08
KCNA10	2.59482	-3.51882	3.46e-08	9.29e-08
HCAR3	2.73455	0.190191	3.59e-08	9.62e-08
HOXC11	3.77866	0.874183	3.66e-08	9.8e-08
PGLYRP4	2.29446	-1.96766	3.72e-08	9.95e-08
HOXC13	4.71528	-1.80176	3.75e-08	1e-07
HCAR2	2.40196	1.49345	3.88e-08	1.04e-07
PAX7	5.67527	-0.592843	4.3e-08	1.14e-07
ANKUB1	3.4155	-2.25076	4.3e-08	1.14e-07
OBP2A	2.9078	-2.39185	4.43e-08	1.18e-07
HIST1H3F	4.01635	0.886915	4.46e-08	1.19e-07
HCN1	2.40785	0.208178	4.57e-08	1.21e-07
TMPRSS11E	4.65261	0.096713	4.62e-08	1.23e-07
TLX3	4.15581	-2.21659	4.69e-08	1.24e-07
CAPN14	2.24922	-0.636182	5.24e-08	1.38e-07
IL17A	2.37055	-1.21329	5.41e-08	1.43e-07
HIST1H2BB	6.77951	0.184674	5.56e-08	1.46e-07
TRIM54	2.73162	1.73758	5.65e-08	1.49e-07
ANKRD1	2.2588	-2.24664	5.85e-08	1.54e-07
IL36G	2.35162	-1.97996	5.99e-08	1.57e-07
BTN1A1	2.16106	-0.141987	6.17e-08	1.62e-07
PRAME	2.58539	1.7168	6.29e-08	1.65e-07
FAM83A	2.26744	1.52888	6.32e-08	1.66e-07
EPGN	2.87406	-2.7357	6.75e-08	1.76e-07
MROH9	3.98008	-3.08247	6.76e-08	1.77e-07
HIST1H3D	2.30262	1.29081	6.76e-08	1.77e-07
USP41	2.07137	-2.14763	6.8e-08	1.78e-07
ANGPTL3	3.23034	-1.14023	6.94e-08	1.81e-07
HIST1H2BM	4.65317	-0.144583	7.34e-08	1.91e-07
UGT2B4	4.67826	-0.398806	7.46e-08	1.94e-07
PAX2	2.80903	-2.11193	7.52e-08	1.96e-07
DLX5	2.37109	-0.604066	8.03e-08	2.08e-07
TBX5	4.12237	-2.14512	8.23e-08	2.13e-07
PRB1	4.28572	-2.9108	8.53e-08	2.21e-07
AIRE	3.00626	-0.0997036	8.62e-08	2.23e-07
PLK5	2.17791	-1.64334	9.18e-08	2.37e-07
LHX3	4.00954	-2.62372	9.21e-08	2.38e-07
HIST1H2BJ	2.14756	2.16856	9.26e-08	2.39e-07
ODAM	2.13661	1.92298	9.6e-08	2.47e-07
GJB6	2.65041	-1.43896	9.64e-08	2.48e-07
GCM1	2.34004	-2.36857	1e-07	2.57e-07
FGF23	3.71211	-2.36609	1.09e-07	2.8e-07
C9orf84	3.06917	-0.0347428	1.11e-07	2.85e-07
SLURP1	3.25278	-3.41783	1.12e-07	2.86e-07
DDX53	5.11479	-2.48296	1.12e-07	2.87e-07
CYP4Z1	2.41678	-2.45855	1.12e-07	2.87e-07
ITIH6	2.58515	-1.80966	1.13e-07	2.9e-07
SERPINA10	2.56232	1.20223	1.15e-07	2.95e-07
C5orf38	2.83457	0.764659	1.18e-07	3.01e-07
CDC20B	2.94486	-2.72382	1.23e-07	3.12e-07
TCHH	2.31595	0.108546	1.25e-07	3.18e-07
MAGEA4	5.99045	-0.584755	1.26e-07	3.21e-07
FOXL2	3.3978	-2.40257	1.32e-07	3.36e-07
PBOV1	4.55372	-1.56479	1.43e-07	3.61e-07
REN	2.33213	1.30843	1.52e-07	3.83e-07
NXF3	3.03651	1.63683	1.56e-07	3.93e-07
TAS2R30	4.77001	-1.1808	1.59e-07	4.01e-07
WNT3A	2.4759	-2.38552	1.63e-07	4.1e-07
ZAN	2.47411	-3.3087	1.73e-07	4.34e-07
FIBCD1	2.17951	4.09958	1.74e-07	4.37e-07
SEMG1	3.27372	0.731768	1.83e-07	4.59e-07
SLC22A12	2.89902	-3.40506	2.01e-07	5.02e-07
SLC22A31	2.86754	1.08213	2.03e-07	5.06e-07
PLA2G2F	2.91861	0.661657	2.04e-07	5.09e-07
INSL4	5.32485	-1.25514	2.06e-07	5.14e-07
HIST1H3A	3.45911	-0.411489	2.06e-07	5.14e-07
NKX2-8	3.90217	-2.91499	2.1e-07	5.23e-07
NR5A1	2.9802	-2.54966	2.11e-07	5.26e-07
SLC6A3	2.30629	-2.40862	2.2e-07	5.46e-07
KRT78	4.16097	-2.11115	2.26e-07	5.62e-07
TYR	4.03698	-2.62326	2.43e-07	6.03e-07
GPRC6A	3.20476	-1.92412	2.55e-07	6.31e-07
ASB18	2.98341	-3.50257	2.66e-07	6.57e-07
LCN1	2.3732	-3.10568	2.67e-07	6.58e-07
PPP2R2C	2.03911	2.40937	2.69e-07	6.63e-07
FAM159B	2.21117	-3.10826	2.9e-07	7.14e-07
C1QTNF8	2.72181	-2.87189	2.93e-07	7.19e-07
POTEF	2.00877	-1.52571	2.98e-07	7.32e-07
CLEC2A	4.78397	-2.82559	3.02e-07	7.42e-07
ADAMTS20	4.1764	-2.85053	3.12e-07	7.65e-07
OR1J4	2.68794	-3.46785	3.14e-07	7.7e-07
KRT74	3.17914	-3.35144	3.25e-07	7.95e-07
COL6A6	2.13088	-0.958065	3.28e-07	8.02e-07
HTR2C	4.85212	-2.34493	3.4e-07	8.29e-07
DAPL1	2.05933	-0.132716	3.79e-07	9.2e-07
MAS1	2.7037	-3.46271	4.05e-07	9.8e-07
OR5M11	2.27238	-3.57226	4.08e-07	9.88e-07
HIST1H2BH	2.00635	1.38177	4.09e-07	9.9e-07
IRX2	2.68696	2.59222	4.3e-07	1.04e-06
CALHM3	2.36168	-2.07473	4.42e-07	1.06e-06
GABRB1	2.09937	-1.04122	4.44e-07	1.07e-06
LIN28A	3.81112	-2.22528	4.47e-07	1.08e-06
SPINT4	4.43695	-2.88885	4.54e-07	1.09e-06
IGFN1	2.14568	0.794037	4.88e-07	1.17e-06
PCSK1	2.73641	4.94482	4.9e-07	1.17e-06
XAGE2	5.01427	-2.00368	5.09e-07	1.22e-06
POU6F2	3.24927	1.09368	5.32e-07	1.27e-06
CCKAR	-2.03053	-3.10999	5.49e-07	1.31e-06
CD300LD	2.43838	-2.9908	5.5e-07	1.31e-06
OTX2	3.65053	-3.44734	5.86e-07	1.39e-06
MUCL1	3.18389	-0.813785	6.07e-07	1.44e-06
CT83	5.48554	-1.49724	6.24e-07	1.48e-06
AC104831.1	3.99079	-2.20246	6.28e-07	1.49e-06
PSAPL1	3.78706	-1.58504	6.29e-07	1.49e-06
CGB7	2.12901	-3.16803	6.42e-07	1.52e-06
TMEM78	2.0964	-3.53301	6.45e-07	1.53e-06
MAP7D2	2.20104	3.41333	6.48e-07	1.53e-06
MYH6	2.53622	-3.53271	6.51e-07	1.54e-06
OTOG	2.33235	-2.46257	6.62e-07	1.57e-06
ASB4	2.25817	-0.389946	6.73e-07	1.59e-06
NKX2-5	3.25509	-2.77329	7.34e-07	1.73e-06
MAGEC2	4.74672	-2.41613	7.49e-07	1.76e-06
GFY	2.96638	-3.20335	7.91e-07	1.86e-06
EN1	2.85635	-2.38587	7.99e-07	1.88e-06
KRT3	2.78366	-3.43958	8.05e-07	1.89e-06
RPTN	4.10925	-2.91631	8.38e-07	1.96e-06
HGFAC	2.0008	-2.48282	8.44e-07	1.98e-06
HIST1H3C	3.53603	0.84144	8.46e-07	1.98e-06
SLC13A5	2.09508	-1.15712	8.49e-07	1.99e-06
KRT13	2.74373	-0.177712	8.8e-07	2.06e-06
CA6	3.4512	-1.7159	9.64e-07	2.25e-06
FAM25A	3.4248	-3.29102	9.98e-07	2.32e-06
CALCB	4.52448	2.67834	1.02e-06	2.37e-06
DCDC1	2.0957	-2.48187	1.05e-06	2.44e-06
BBOX1	2.82589	-1.10477	1.05e-06	2.45e-06
ERVV-1	2.4252	-3.05164	1.11e-06	2.58e-06
SPATA21	2.24709	-2.81551	1.13e-06	2.61e-06
WIF1	3.50532	2.25584	1.15e-06	2.65e-06
TBR1	3.42741	-2.87739	1.15e-06	2.65e-06
CFAP47	2.5025	-2.55111	1.16e-06	2.68e-06
CALML5	4.19401	-2.19901	1.22e-06	2.82e-06
CSAG3	4.22393	-2.61871	1.23e-06	2.83e-06
DSPP	4.63902	-2.64665	1.23e-06	2.83e-06
MSMB	4.1184	-1.04408	1.24e-06	2.86e-06
CDH7	2.47063	-1.39372	1.43e-06	3.28e-06
AC013394.1	2.17063	0.977693	1.46e-06	3.36e-06
KCTD16	2.07365	-0.122531	1.52e-06	3.48e-06
TAS2R19	2.12113	-1.6717	1.55e-06	3.55e-06
ACP7	2.80569	-2.49753	1.59e-06	3.64e-06
PRB2	2.87428	-2.90118	1.65e-06	3.75e-06
REG4	2.56226	9.40571	1.7e-06	3.88e-06
PNMT	2.19428	-0.446479	1.83e-06	4.14e-06
LCN15	3.381	5.57933	1.98e-06	4.47e-06
TAS2R3	3.27269	-2.3121	2.01e-06	4.54e-06
HPN	2.3073	2.18829	2.08e-06	4.68e-06
S100G	3.26534	-3.13887	2.13e-06	4.81e-06
MAGEB2	5.31461	-0.753631	2.21e-06	4.98e-06
PSG11	3.9039	-3.34502	2.58e-06	5.77e-06
GJB7	2.90292	-1.17719	2.6e-06	5.8e-06
KRTAP1-1	3.05646	-3.55351	2.68e-06	5.97e-06
SFTA3	4.77529	-1.99624	2.7e-06	6.03e-06
SFTPB	2.96297	0.555724	2.72e-06	6.06e-06
FAM196B	2.22818	-1.83481	2.74e-06	6.11e-06
IRX4	3.26863	-3.20884	2.81e-06	6.25e-06
PAX3	3.16088	-2.54499	3.07e-06	6.8e-06
TKTL1	3.52624	0.647829	3.08e-06	6.84e-06
CRCT1	4.61885	-2.27866	3.11e-06	6.9e-06
FOXG1	3.61984	-1.29165	3.13e-06	6.94e-06
PAGE1	4.85091	-1.99963	3.18e-06	7.03e-06
COX7B2	3.83697	-3.22491	3.19e-06	7.06e-06
TAS2R13	3.85518	-1.98598	3.28e-06	7.24e-06
WNT7A	2.84665	-1.66112	3.33e-06	7.36e-06
TMPRSS11D	3.55376	-2.42289	4.39e-06	9.59e-06
CNDP1	2.20269	-0.938995	4.4e-06	9.61e-06
VAX1	3.71987	-1.8032	4.42e-06	9.65e-06
FGL1	3.41305	-0.892194	4.48e-06	9.78e-06
BPIFB2	3.7524	-1.91527	4.48e-06	9.78e-06
PSG6	4.06219	-3.25714	4.65e-06	1.01e-05
UNCX	3.80319	-3.08474	4.87e-06	1.06e-05
FRMPD2	2.27512	-2.73512	4.93e-06	1.07e-05
SCGB3A2	2.90965	-2.7888	4.97e-06	1.08e-05
MAGEA9B	4.32781	-2.83603	5.03e-06	1.09e-05
TMEM213	2.58924	-1.64691	5.07e-06	1.1e-05
OR1J1	2.5865	-3.47592	5.13e-06	1.11e-05
CLPSL1	3.60806	-3.39689	5.21e-06	1.13e-05
NTF4	2.2969	-2.96838	5.4e-06	1.17e-05
FGA	2.06898	-0.223465	5.76e-06	1.25e-05
GRM4	2.10692	-0.0299241	6.23e-06	1.34e-05
IL17F	2.0887	-2.50999	6.26e-06	1.35e-05
SOX21	2.96254	-2.76494	6.62e-06	1.42e-05
SSX1	3.54098	-3.5253	6.68e-06	1.43e-05
SPIN2A	2.01777	-1.10012	6.76e-06	1.45e-05
BANF2	2.21793	-3.54984	7.25e-06	1.55e-05
ZNF716	3.57478	-3.17377	7.27e-06	1.55e-05
OR10A5	3.58062	-3.44929	7.65e-06	1.63e-05
CCDC83	2.67711	-3.02465	7.71e-06	1.64e-05
NKX6-1	2.75775	-2.80243	7.77e-06	1.65e-05
PRSS50	2.20553	-2.1223	7.87e-06	1.68e-05
BOLL	2.82335	-2.86797	8.15e-06	1.73e-05
RSPO4	2.47225	-0.732	8.16e-06	1.73e-05
ERVW-1	2.22552	-0.833675	8.28e-06	1.76e-05
ADAM2	3.04873	-3.30848	8.38e-06	1.78e-05
REG3A	3.27442	7.78528	8.73e-06	1.85e-05
TREML4	2.59526	-2.37253	8.93e-06	1.89e-05
DSCR8	4.24983	-2.74443	9.17e-06	1.93e-05
GREB1L	2.01974	0.36695	9.67e-06	2.04e-05
PRH2	2.14438	-2.23121	9.78e-06	2.06e-05
TMPRSS11A	3.42318	-3.31941	1e-05	2.1e-05
BRDT	2.38325	-3.41728	1.04e-05	2.17e-05
SPRR2F	4.67456	-1.26193	1.17e-05	2.44e-05
CTAG2	4.62853	-1.81942	1.19e-05	2.47e-05
ADAM20	2.42718	-2.12341	1.21e-05	2.52e-05
DCAF4L2	4.31316	-2.83494	1.22e-05	2.53e-05
SERPINB13	4.54908	-2.15482	1.25e-05	2.6e-05
KCNE1B	3.66149	-1.53251	1.27e-05	2.64e-05
OR13H1	3.719	-3.47633	1.49e-05	3.08e-05
FLG2	3.55539	-2.98237	1.55e-05	3.2e-05
KRTAP3-3	2.30644	-3.27093	1.62e-05	3.33e-05
LIN28B	4.62499	-1.57092	1.64e-05	3.37e-05
SALL3	3.67944	-2.75153	1.76e-05	3.6e-05
NKX6-3	3.58346	0.17287	1.88e-05	3.85e-05
LIPF	3.39195	-2.94145	1.93e-05	3.93e-05
SULT1C3	2.30607	-0.351155	2.04e-05	4.14e-05
PRLHR	2.98628	-2.76006	2.18e-05	4.41e-05
PLET1	2.89266	-3.31517	2.23e-05	4.51e-05
GPR52	3.33557	-2.26609	2.29e-05	4.62e-05
RGS21	2.93191	-3.43526	2.35e-05	4.75e-05
CNPY1	2.52774	-3.31107	2.37e-05	4.78e-05
PYDC1	2.40329	-2.72223	2.42e-05	4.87e-05
CDH16	2.21729	1.34569	2.49e-05	5.01e-05
PSG7	3.80001	-3.27737	2.55e-05	5.13e-05
CRP	2.98842	-2.89116	2.76e-05	5.54e-05
CT45A10	3.89231	-3.13951	2.85e-05	5.7e-05
BPIFB1	3.26975	-1.53363	2.86e-05	5.73e-05
[truncated: 85 more rows]
